# Supplementary material
Source: publisher figshare collection journal article supplement (https://acs.figshare.com/ndownloader/files/4631689)
Supplement: Supplementary file 1 [file 4631689]

## Supporting Information for

### Stereoselective Synthesis of 2,3-Unsaturated-1,6-Oligosaccharides by Means of a Glycal-derived Allyl Epoxide and *N*-Nosyl Aziridine

Valeria Di Bussolo, Lorenzo Checchia, Maria Rosaria Romano, Mauro Pineschi,  
and Paolo Crotti

*Dipartimento di Chimica Bioorganica e Biofarmacia, Università di Pisa,*

*Via Bonanno 33, I-56126 Pisa, Italy*

|                                                                                                                 |           |
|-----------------------------------------------------------------------------------------------------------------|-----------|
| <b>General Procedures, Materials, Instrumentation</b>                                                           | <b>3</b>  |
| <b>Synthesis of the glycosyl acceptor 7</b>                                                                     | <b>4</b>  |
| <b>6-<i>O</i>-(2-Tetrahydropyranyl)-3,4-di-<i>O</i>-acetyl-D-glucal (10)</b>                                    | <b>4</b>  |
| <b>6-<i>O</i>-(2-Tetrahydropyranyl)-D-glucal (11)</b>                                                           | <b>4</b>  |
| <b>6-<i>O</i>-(2-Tetrahydropyranyl)-3-<i>O</i>-(<i>t</i>-butyldimethylsilyl)-D-glucal (12)</b>                  | <b>5</b>  |
| <b>6-<i>O</i>-(2-Tetrahydropyranyl)-3-<i>O</i>-(<i>t</i>-butyldimethylsilyl)-4-<i>O</i>-mesyl-D-glucal (13)</b> | <b>5</b>  |
| <b>3-<i>O</i>-(<i>t</i>-Butyldimethylsilyl)-4-<i>O</i>-mesyl-D-glucal (7)</b>                                   | <b>6</b>  |
| <b>Synthesis of trisaccharide 5 through acetylated compounds</b>                                                | <b>7</b>  |
| <b>Compound 15</b>                                                                                              | <b>7</b>  |
| <b>Compound 15-Ac</b>                                                                                           | <b>7</b>  |
| <b>Compound 16-Ac</b>                                                                                           | <b>8</b>  |
| <b>Compound 18-Ac</b>                                                                                           | <b>9</b>  |
| <b>Compound 18-diAc</b>                                                                                         | <b>9</b>  |
| <b>Compound 19-diAc</b>                                                                                         | <b>10</b> |
| <b>Compound 5-diAc</b>                                                                                          | <b>11</b> |
| <b>Compound 5-triAc</b>                                                                                         | <b>11</b> |
| <b>Trisaccharide 5</b>                                                                                          | <b>12</b> |
| <b>Synthesis of trisaccharide 5 through non-acetylated compounds</b>                                            | <b>14</b> |
| <b>Scheme 9</b>                                                                                                 | <b>14</b> |
| <b>Compound 16</b>                                                                                              | <b>14</b> |
| <b>Compound 18</b>                                                                                              | <b>15</b> |
| <b>Compound 19</b>                                                                                              | <b>16</b> |
| <b>Trisaccharide 5</b>                                                                                          | <b>16</b> |

|                                                                                      |           |
|--------------------------------------------------------------------------------------|-----------|
| <b>Synthesis of glycosyl acceptor 21</b>                                             | <b>18</b> |
| <b>6-<i>O</i>-(2-Tetrahydropyranyl)-4-<i>O</i>-mesyl-D-glucal (22)</b>               | <b>18</b> |
| <b>6-<i>O</i>-(2-Tetrahydropyranyl)-3-deoxy-3-azido-D-gulal (23)</b>                 | <b>18</b> |
| <b>6-<i>O</i>-(2-Tetrahydropyranyl)-3-deoxy-3-amino-D-gulal (24)</b>                 | <b>19</b> |
| <b>6-<i>O</i>-(2-Tetrahydropyranyl)-3-deoxy-3-(<i>N</i>-nosylamino)-D-gulal (25)</b> | <b>19</b> |
| <b>3-Deoxy-3-(<i>N</i>-nosylamino)-D-gulal (21)</b>                                  | <b>20</b> |
| <b>Synthesis of trisaccharide 6</b>                                                  | <b>21</b> |
| <b>Compound 27</b>                                                                   | <b>21</b> |
| <b>Compound 28</b>                                                                   | <b>21</b> |
| <b>Compound 30</b>                                                                   | <b>22</b> |
| <b>Compound 31</b>                                                                   | <b>23</b> |
| <b>Compound 33</b>                                                                   | <b>24</b> |
| <b>Trisaccharide 6</b>                                                               | <b>24</b> |
| <b>Synthesis of disaccharides 34, 36 and 41</b>                                      | <b>26</b> |
| <b>Disaccharide 34</b>                                                               | <b>26</b> |
| <b>Compound 35</b>                                                                   | <b>26</b> |
| <b>Disaccharide 36</b>                                                               | <b>27</b> |
| <b>Compound 37</b>                                                                   | <b>28</b> |
| <b>Compound 38</b>                                                                   | <b>29</b> |
| <b>Compound 40</b>                                                                   | <b>29</b> |
| <b>Disaccharide 41</b>                                                               | <b>30</b> |
| <b>References</b>                                                                    | <b>30</b> |

**General Procedures.** All reactions were performed in flame-dried modified Schlenk (Kjeldahl shape) flasks fitted with a glass stopper or rubber septa under a positive pressure of argon. Air- and moisture-sensitive liquids and solutions were transferred via a syringe. Organic solutions were dried on MgSO<sub>4</sub> and concentrated by a rotary evaporator below 40°C at *ca.* 25 Torr. Flash column chromatography was performed employing 230-400 mesh silica gel (Macherey-Nagel). Analytical TLC was performed on Alugram SIL G/UV<sub>254</sub> silica gel sheets (Macherey-Nagel) with detection by 0.5% phosphomolybdic acid solution in 95% EtOH.

**Materials.** Tri-*O*-acetyl-D-glucal, TBDMS-Cl, 1.0 M TBAF in THF were purchased from Aldrich and used without purification. CCL lipase (lipase from *Candida Cylindracea*), MsCl, anhydrous MeCN over molecular sieves, anhydrous pyridine over molecular sieves, anhydrous DMF over molecular sieves, and *t*-BuOK were purchased from Fluka and used without purification. Tetramethylguanidinium azide (TMGA) was prepared as described.<sup>1</sup> *i*-PrOH and *t*-BuOH were distilled from calcium hydride at 760 Torr. Benzene, toluene, Et<sub>2</sub>O and THF were distilled from sodium/benzophenone. Alcohol **9**,<sup>2</sup> *trans* hydroxy mesylate **14**<sup>3</sup> and *trans* *N*-nosyl-*O*-mesylate **26**<sup>4</sup> were prepared as previously described.

**Instrumentation.** Infrared (IR) spectra were obtained using a FTIR spectrophotometer. Data are presented as frequency of absorption (cm<sup>-1</sup>). Proton and carbon-13 nuclear magnetic resonance (<sup>1</sup>H NMR and <sup>13</sup>C NMR) spectra were recorded at 250 and 62.5 MHz, respectively; chemical shifts are expressed in parts per million (□ scale) downfield from tetramethylsilane and refer to residual protium in the NMR solvent (CHCl<sub>3</sub>: □ 7.26; CD<sub>3</sub>CN: □ 1.94). Data are presented as follows: chemical shift, multiplicity (s=singlet, d=doublet, t=triplet, m=multiplet and/or multiple resonances), integration, coupling constant in Hertz (Hz). Molecular weight of trisaccharides **5**, **5-triAc**, and **6** and disaccharides **34** and **36** were determined by flow injection analysis (FIA) on a 1100 MSD HP mass spectrometer (electrospray ionization): solvent: MeOH; flow: 0.3 mL/min; sample concentration: 0.1 mg/mL. Melting points are uncorrected.

## Synthesis of the glycosyl acceptor **7** (Scheme 3, text)

### 6-*O*-(2-Tetrahydropyranyl)-3,4-di-*O*-acetyl-D-glucal (**10**)

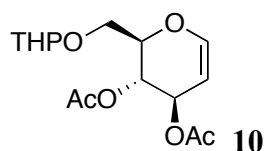

A solution of PPTS (0.54 g, 2.15 mmol) in anhydrous  $\text{CH}_2\text{Cl}_2$  (150 mL) was added dropwise at room temperature to a stirred solution of alcohol **9** (4.95 g, 21.50 mmol)<sup>2</sup> in DHP (2.92 mL, 32.2 mmol) and the reaction mixture was stirred at same temperature for 16 h. Dilution with  $\text{CH}_2\text{Cl}_2$  and evaporation of the washed (saturated aqueous  $\text{NaHCO}_3$  and saturated aqueous  $\text{NaCl}$ ) organic solution afforded a crude reaction product (6.70 g) consisting of **10** ( $^1\text{H}$  NMR), which was subjected to flash chromatography. Elution with an 8:2 hexane/AcOEt mixture yielded the THP-derivative **10** (5.18 g, 77% yield), pure as a liquid:  $R_f = 0.16$  (8:2 hexane/AcOEt); FTIR (neat film)  $\square$  1743, 1471, 1238, 1033  $\text{cm}^{-1}$ .  $^1\text{H}$  NMR ( $\text{CDCl}_3$ )  $\square$  6.48 (dt, 1H,  $J = 6.0, 1.3$  Hz), 5.17-5.38 (m, 2H), 4.75-4.85 (m, 1H), 4.53-4.70 (m, 1H), 4.17-4.30 (m, 1H), 3.69-4.00 (m, 2H), 3.40-3.68 (m, 2H), 2.06 and 2.07 (two singlets corresponding to two diastereoisomers, 3H), 2.03 and 2.04 (two singlets corresponding to two diastereoisomers, 3H), 1.43-1.92 (m, 6H).  $^{13}\text{C}$  NMR ( $\text{CDCl}_3$ )  $\square$  170.4, 169.5, 145.8, 99.3, 99.2, 98.6, 98.4, 75.3, 75.1, 74.9, 74.7, 67.7, 67.4, 65.3, 64.8, 62.1, 61.7, 30.3, 25.3, 21.0, 20.8, 19.2, 19.0. Anal. Calcd for  $\text{C}_{15}\text{H}_{22}\text{O}_7$ : C, 57.32; H, 7.05. Found: C, 57.38; H, 7.23.

### 6-*O*-(2-Tetrahydropyranyl)-D-glucal (**11**)

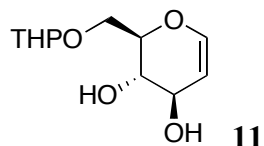

A solution of diacetate **10** (0.377 g, 1.20 mmol) in MeOH (4.3 mL) was treated with MeONa (0.009 g, 0.167 mmol) and the reaction mixture was stirred for 2 h at room temperature. Evaporation of the organic solvent afforded a crude liquid product (0.248 g, 90% yield) consisting of diol **11**, practically pure, as a liquid:  $R_f = 0.10$  (8:2  $\text{CH}_2\text{Cl}_2/\text{AcOEt}$ ); FTIR (neat film)  $\square$  3398, 1647, 1350, 1232, 1126, 1080, 1026  $\text{cm}^{-1}$ .  $^1\text{H}$  NMR ( $\text{CDCl}_3$ )  $\square$  6.27 (dt, 1H,  $J =$

6.0, 1.9 Hz), 4.65 (dt, 1H,  $J = 6.0, 1.5$  Hz), 4.45-4.62 (m, 1H), 3.37-4.31 (m, 9H), 1.38-1.84 (m, 6H).  $^1\text{H}$  NMR ( $\text{CD}_3\text{CN}$ )  $\square$  6.29 (d, 1H,  $J = 6.0$  Hz), 4.65 (dd, 1H,  $J = 6.0, 1.6$  Hz), 4.54-4.60 (m, 1H), 4.13-4.38 (m, 9H), 1.41-1.80 (m, 6H).  $^{13}\text{C}$  NMR ( $\text{CDCl}_3$ )  $\square$  144.3, 144.2, 103.2, 102.8, 100.8, 100.7, 99.4, 77.5, 77.1, 76.6, 69.6, 69.5, 69.4, 66.7, 66.4, 64.4, 62.6, 31.1, 30.8, 30.4, 25.3, 25.1, 21.3, 20.6, 19.5.  $^{13}\text{C}$  NMR ( $\text{CD}_3\text{CN}$ )  $\square$  144.4, 144.3, 104.7, 104.6, 103.7, 103.5, 102.4, 100.1, 78.7, 78.6, 78.5, 78.0, 75.2, 69.5, 68.6, 67.3, 66.8, 65.6, 65.4, 63.4, 62.8, 31.9, 31.8, 31.4, 31.2, 26.1, 26.0, 20.6, 20.3. Anal. Calcd for  $\text{C}_{11}\text{H}_{18}\text{O}_5$ : C, 57.38; H, 7.88. Found: C, 56.99; H, 7.95.

### 6-*O*-(2-Tetrahydropyranyl)-3-*O*-(*t*-butyldimethylsilyl)-*D*-glucal (**12**)

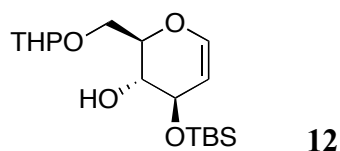

A solution of diol **11** (0.278 g, 1.21 mmol) in anhydrous DMF (3.5 mL) was treated with imidazole (0.165 g, 2.4 mmol) and TBDMS-Cl (0.20 g, 1.33 mmol) and the reaction mixture was stirred 24 h at room temperature. Dilution with  $\text{CH}_2\text{Cl}_2$  and evaporation of the washed (saturated aqueous NaCl) organic solvent afforded a crude product (0.395 g, 95% yield) consisting of TBS-derivative **12**, practically pure, as a liquid, which was used in the next step without any further purification. An analytical sample of crude **12** was purified by flash chromatography. Elution with a 8:2 hexane/AcOEt mixture afforded pure alcohol **12** as a liquid:  $R_f = 0.24$  (8:2 hexane/AcOEt); FTIR (neat film)  $\square$  3425, 1660, 1464, 1251, 1126, 1080, 1026  $\text{cm}^{-1}$ .  $^1\text{H}$  NMR ( $\text{CDCl}_3$ )  $\square$  6.30 (d, 1H,  $J = 6.0$  Hz), 4.52-4.74 (m, 2H), 4.17-4.34 (m, 1H), 3.67-4.11 (m, 5H), 3.43-3.59 (m, 1H), 1.41-1.92 (m, 6H), 0.91 (s, 9H), 0.12 (s, 6H).  $^{13}\text{C}$  NMR ( $\text{CDCl}_3$ )  $\square$  143.8, 143.6, 104.5, 104.4, 103.6, 100.6, 100.5, 99.6, 99.5, 77.4, 71.1, 70.4, 70.2, 70.0, 66.9, 66.6, 66.1, 65.2, 64.1, 62.6, 30.9, 30.6, 26.5, 26.4, 26.1, 26.0, 20.6, 19.7, 18.4, 18.2, -4.3, -4.2. Anal. Calcd for  $\text{C}_{17}\text{H}_{32}\text{O}_5\text{Si}$ : C, 59.27; H, 9.36. Found: C, 59.65; H, 8.95.

### 6-*O*-(2-Tetrahydropyranyl)-3-*O*-(*t*-butyldimethylsilyl)-4-*O*-mesyl-*D*-glucal (**13**)

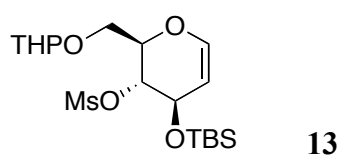

A solution of the alcohol **12** (0.344 g, 1.0 mmol) in anhydrous pyridine (2.2 mL) was treated at 0°C with MsCl (0.32 mL, 4.0 mmol) and the reaction mixture was stirred 18 h at the same temperature. Dilution with AcOEt and evaporation of the washed (saturated aqueous NaCl) organic solvent afforded a crude product (0.401 g, 95% yield) consisting of mesylate **13**, practically pure, as a liquid, which was used in the next step without any further purification. An analytical sample of crude **13** was subjected to flash chromatography. Elution with an 8:2 hexane/AcOEt mixture afforded pure mesylate **13**, as a liquid:  $R_f = 0.32$  (7:3 hexane/AcOEt); FTIR (neat film)  $\nu$  1647, 1471, 1361, 1253, 1178, 1074, 956  $\text{cm}^{-1}$ .  $^1\text{H}$  NMR ( $\text{CDCl}_3$ )  $\delta$  6.35 (d, 1H,  $J = 5.5$  Hz), 4.68-4.85 (m, 2H), 4.57-4.65 (m, 1H), 4.22-4.38 (m, 2H), 3.68-4.03 (m, 3H), 3.40-3.54 (m, 1H), 3.07 and 3.05 (two singlets corresponding to two diastereoisomers, 3H), 1.41-1.91 (m, 6H), 0.80 (s, 9H), 0.05 (s, 6H).  $^{13}\text{C}$  NMR ( $\text{CDCl}_3$ )  $\delta$  143.5, 101.5, 99.5, 99.4, 99.1, 99.0, 98.6, 98.5, 77.7, 76.4, 75.6, 74.8, 65.4, 64.9, 64.8, 64.7, 63.3, 62.4, 62.3, 38.9, 38.8, 30.9, 30.3, 30.4, 25.7, 25.3, 19.8, 19.4, 17.9, -4.5, -4.6, -4.7. Anal. Calcd for  $\text{C}_{18}\text{H}_{34}\text{O}_7\text{SSi}$ : C, 51.16; H, 8.12. Found: C, 51.01; H, 7.94.

### 3-*O*-(*t*-Butyldimethylsilyl)-4-*O*-mesyl-D-glucal (**7**)

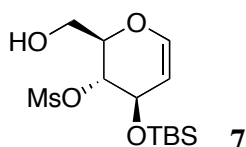

PPTS (0.030 g, 0.71 mmol) was added to a solution of mesylate **13** (0.050 g, 0.13 mmol) in absolute EtOH (6 mL) and the reaction mixture was carefully stirred 18 h at 35°C. After dilution with  $\text{CH}_2\text{Cl}_2$ , solid  $\text{NaHCO}_3$  was added until the solution turned out to be slightly basic. Evaporation of the organic solution afforded a crude reaction product (0.24 g) consisting of alcohol **7**, which was subjected to flash chromatography. Elution with a 6:4 hexane/AcOEt mixture yielded alcohol **7** (0.17 g, 71% yield), pure as a liquid:  $[\alpha]_D^{20} -31.9$  ( $c$  1.8,  $\text{CHCl}_3$ );  $R_f = 0.29$  (6:4 hexane/AcOEt); FTIR (neat film)  $\nu$  3493, 1643, 1473, 1359, 1253, 1176  $\text{cm}^{-1}$ .  $^1\text{H}$  NMR ( $\text{CDCl}_3$ ) (dd, 1H,  $J = 6.1, 1.0$  Hz), 4.66-4.76 (m, 2H), 4.34-4.40 (m, 1H), 4.04-4.12 (m, 1H), 3.73-3.98 (m, 2H), 3.10 (s, 3H), 2.79 (dd, 1H,  $J = 8.0, 6.0$  Hz), 0.86 (s, 9H), 0.09 (s, 6H).  $^{13}\text{C}$  NMR ( $\text{CDCl}_3$ )  $\delta$  144.0, 101.4, 76.3, 75.5, 65.7, 60.5, 38.5, 25.6, 17.7, -4.6, -4.7. Anal. Calcd for  $\text{C}_{13}\text{H}_{26}\text{O}_6\text{SSi}$ : C, 46.13; H, 7.74. Found: C, 46.46; H, 7.65.

## Synthesis of trisaccharide **5** through acetylated compounds

### (Scheme 4, text)

#### 6-*O*-[6'-*O*-(benzyl)-2',3'-dideoxy- $\beta$ -D-*threo*-hex-2'-enopyranosyl]-4-*O*-mesyl-3-*O*-(*t*-butyldimethylsilyl)-D-glucal (**15**)

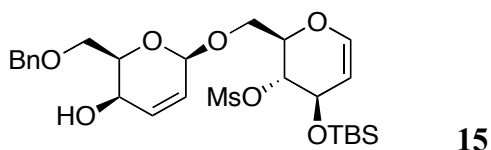

A solution of *trans* hydroxy mesylate **14** (0.125 g, 0.40 mmol)<sup>3</sup> in anhydrous THF (3.5 mL) was treated with *t*-BuOK (0.045 g, 0.40 mmol) and the reaction mixture was stirred at room temperature for 30 min. Alcohol **7** (0.27 g, 0.80 mmol, 2 equiv) was added and the reaction mixture was stirred 18 h at room temperature. Dilution with CH<sub>2</sub>Cl<sub>2</sub> and evaporation of the washed (saturated aqueous NaCl) organic solution afforded a crude product (0.34 g) consisting of a mixture of  $\beta$ -*O*-glycoside **15** and unreacted alcohol **7** (<sup>1</sup>H NMR) which was subjected to flash chromatography. Elution with a 9:1 CH<sub>2</sub>Cl<sub>2</sub>/AcOEt mixture yielded  $\beta$ -*O*-glycoside **15** (0.160 g, 72% yield), pure as a liquid: [ $\alpha$ ]<sub>D</sub><sup>20</sup> -33.1 (*c* 2.2, CHCl<sub>3</sub>); *R*<sub>f</sub> = 0.24 (9:1 CH<sub>2</sub>Cl<sub>2</sub>/AcOEt); FTIR (neat film)  $\bar{\nu}$  3420, 1647, 1464, 1357, 1257, 1186, 1099, 1066, 968 cm<sup>-1</sup>. <sup>1</sup>H NMR (CDCl<sub>3</sub>)  $\delta$  7.34 (s, 5H), 6.37 (dd, 1H, *J* = 6.3, 1.0 Hz), 6.14 (ddd, 1H, *J* = 10.1, 5.0, 1.4 Hz), 5.90 (d, 1H, *J* = 10.1 Hz), 5.13 (dd, 1H, *J* = 2.8, 1.4 Hz), 4.73-4.81 (m, 2H), 4.58 (s, 2H), 4.28-4.38 (m, 2H), 4.05-4.16 (m, 1H), 3.62-4.01 (m, 6H), 3.07 (s, 3H), 0.89 (s, 9H), 0.11 (s, 6H). <sup>13</sup>C NMR (CDCl<sub>3</sub>)  $\delta$  143.6, 138.1, 130.9, 130.6, 128.5, 127.8, 101.8, 98.4, 77.3, 75.5, 74.5, 73.7, 69.7, 66.6, 65.4, 62.8, 39.1, 25.9, 18.0, -4.3, -4.4. Anal. Calcd for C<sub>26</sub>H<sub>40</sub>O<sub>9</sub>SSi: C, 56.09; H, 7.24. Found: C, 56.01, H, 7.55.

#### 6-*O*-[6'-*O*-(benzyl)-4'-*O*-acetyl-2',3'-dideoxy- $\beta$ -D-*threo*-hex-2'-enopyranosyl]-4-*O*-mesyl-3-*O*-(*t*-butyldimethylsilyl)-D-glucal (**15-Ac**)

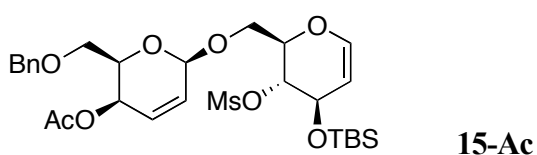

A solution of *O*-glycoside **15** (0.153 g, 0.28 mmol) in anhydrous pyridine (1.8 mL) was treated at 0°C with Ac<sub>2</sub>O (0.6 mL) and the reaction mixture was stirred at room temperature for 16 h. Dilution with toluene and evaporation of the organic solution afforded a crude product (0.16 g, 99% yield) consisting of acetate **15-Ac**, practically pure as a liquid:  $[\alpha]_D^{20}$  -87.4 (*c* 0.7, CHCl<sub>3</sub>);  $R_f$  = 0.42 (6:4 hexane/AcOEt); FTIR (neat film)  $\nu$  1739, 1655, 1464, 1357, 1244, 1178, 1093, 1066, 960 cm<sup>-1</sup>. <sup>1</sup>H NMR (CDCl<sub>3</sub>)  $\delta$  7.26-7.42 (m, 5H), 6.39 (d, 1H, *J* = 6.0 Hz), 6.12 (ddd, 1H, *J* = 10.1, 4.7, 1.1 Hz), 6.01 (d, 1H, *J* = 10.1 Hz), 5.18 (s, 1H), 5.09-5.15 (m, 1H), 4.79 (dd, 2H, *J* = 6.0, 4.2 Hz), 4.60 (d, 1H, *J* = 12.0 Hz), 4.48 (d, 1H, *J* = 12.0 Hz), 4.35-4.43 (m, 1H), 4.28-4.34 (m, 1H), 4.12 (dd, 1H, *J* = 11.4, 2.8 Hz), 3.91-4.05 (m, 2H), 3.64 (d, 1H, *J* = 6.3 Hz), 3.07 (s, 3H), 2.00 (s, 3H), 0.90 (s, 9H), 0.13 (s, 6H). <sup>13</sup>C NMR (CDCl<sub>3</sub>)  $\delta$  170.6, 143.6, 138.0, 132.5, 129.1, 128.5, 128.3, 127.9, 127.8, 126.8, 125.4, 101.7, 98.1, 77.1, 75.4, 73.6, 72.6, 68.7, 66.5, 64.9, 64.0, 39.0, 25.8, 21.6, 21.0, 18.0, -4.4, -4.5. Anal. Calcd for C<sub>28</sub>H<sub>42</sub>O<sub>10</sub>SSi: C, 56.16; H, 7.07. Found: C, 56.44; H, 6.81.

**6-*O*-[6'-*O*-(benzyl)-4''-*O*-acetyl-2',3'-dideoxy- $\beta$ -D-*threo*-hex-2'-enopyranosyl]-4-*O*-mesyl-D-glucal (**16-Ac**)**

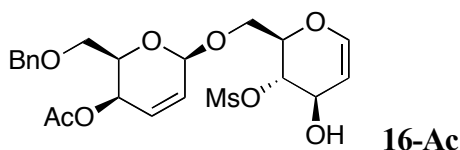

A solution of mesylate **15-Ac** (0.090 g, 0.15 mmol) in anhydrous THF (6.3 mL) was treated at 0°C with 1M TBAF in THF (0.15 mL). After 2h stirring at the same temperature, dilution with Et<sub>2</sub>O and evaporation of the washed (saturated aqueous NaCl) organic solution afforded a crude product (0.071 g, 98% yield) consisting of *trans* hydroxy mesylate **16-Ac** which was used in the next step without any further purification. An analytical sample of crude **16-Ac** was purified by flash chromatography. Elution with a 6:4 hexane/AcOEt mixture afforded pure **16-Ac** as a liquid:  $R_f$  = 0.10 (6:4 hexane/AcOEt); FTIR (neat film)  $\nu$  3420, 1734, 1460, 1371, 1261, 1176, 1080, 1041, 1020, 960 cm<sup>-1</sup>. <sup>1</sup>H NMR (CDCl<sub>3</sub>)  $\delta$  7.27-7.40 (m, 5H), 6.37 (dd, 1H, *J* = 6.0, 1.0 Hz), 6.10 (ddd, 1H, *J* = 10.1, 4.6, 1.0 Hz), 6.00 (d, 1H, *J* = 10.1 Hz), 5.19 (s, 1H), 5.06-5.13 (m, 1H), 4.91 (dd, 1H, *J* = 9.0, 6.5 Hz), 4.78 (dd, 1H, *J* = 6.0, 2.6 Hz), 4.60 (d, 1H, *J* = 12.0 Hz), 4.48 (d, 1H, *J* = 12.0 Hz), 4.40-4.44 (m, 1H), 4.22 (dd, 1H, *J* = 11.1, 2.8 Hz), 4.05-4.15 (m, 1H), 3.95-4.04 (m, 1H), 3.86 (dd, 1H, *J* = 11.1, 4.6 Hz), 3.55-3.77 (m, 3H) 3.17 (s, 3H), 1.99 (s, 3H). <sup>13</sup>C NMR (CDCl<sub>3</sub>)  $\delta$  170.7, 144.3, 142.2, 138.0,



132.1, 128.5, 127.9, 127.8, 126.8, 102.8, 98.2, 78.8, 75.1, 73.6, 72.8, 68.9, 67.1, 66.4, 64.9, 64.1, 39.0, 19.8. Anal. Calcd for C<sub>22</sub>H<sub>28</sub>O<sub>10</sub>S: C, 54.53; H, 5.83. Found: C, 54.23; H, 5.59.

**6-O-[6'-O-[6''-O-(benzyl)-4-O-acetyl-2'',3''-dideoxy- $\alpha$ -D-threo-hex-2''-enopyranosyl]-2',3'-dideoxy- $\alpha$ -D-threo-hex-2'-enopyranosyl]-4-O-mesyl-3-O-(*t*-butyldimethylsilyl)-D-glucal (18-Ac)**

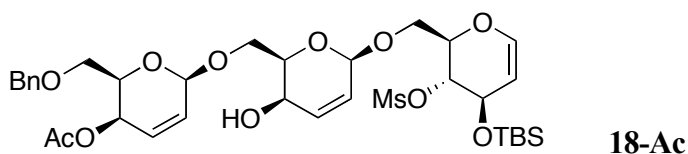

Following the same procedure used for the preparation of  $\alpha$ -O-glycoside **15**, the treatment of a solution of *trans* hydroxy mesylate **16-Ac** (0.045 g, 0.093 mmol) in anhydrous MeCN (1 mL) with *t*-BuOK (0.011 g, 0.098 mmol, 1.05 equiv) in the presence of alcohol **7** (0.063 g, 0.186 mmol, 2 equiv) afforded, after 48 h stirring at room temperature, a crude product (0.092 g) consisting of  $\alpha$ -O-glycoside **18-Ac** and unreacted alcohol **7** (<sup>1</sup>H NMR) which was subjected to flash chromatography. Elution with a 1:1 hexane/AcOEt mixture yielded  $\alpha$ -O-glycoside **18-Ac** (0.047 g, 70% yield), pure as a liquid:  $[\alpha]_D^{20}$  -77.4 (*c* 0.8, CHCl<sub>3</sub>); R<sub>f</sub> = 0.17 (1:1 hexane/AcOEt); FTIR (neat film)  $\nu$  3431, 1739, 1655, 1464, 1363, 1251, 1178, 1112, 1066, 968 cm<sup>-1</sup>. <sup>1</sup>H NMR (CDCl<sub>3</sub>)  $\delta$  7.29-7.35 (m, 5H), 6.38 (d, 1H, *J* = 6.0 Hz), 6.05-6.17 (m, 2H), 5.97 (d, 1H, *J* = 10.2 Hz), 5.91 (d, 1H, *J* = 10.2 Hz), 5.18 (d, 1H, *J* = 1.0 Hz), 5.13 (d, 1H, *J* = 1.0 Hz), 5.07-5.12 (m, 1H), 4.73-4.81 (m, 2H), 4.60 (d, 1H, *J* = 12.0 Hz), 4.47 (d, 1H, *J* = 12.0 Hz), 4.29-4.38 (m, 2H), 4.05-4.14 (m, 2H), 3.76-4.04 (m, 6H), 3.58-3.69 (m, 2H), 3.07 (s, 3H), 2.00 (s, 3H), 0.90 (s, 9H), 0.12 (s, 6H). <sup>13</sup>C NMR (CDCl<sub>3</sub>)  $\delta$  170.7, 143.7, 138.2, 132.6, 130.8, 128.6, 128.0, 126.9, 102.0, 98.5, 98.2, 77.4, 75.7, 74.6, 73.7, 72.8, 68.8, 68.4, 66.5, 65.4, 64.1, 62.3, 39.2, 29.9, 29.5, 26.0, 22.9, 21.1, 18.2, 14.3, -4.3. Anal. Calcd for C<sub>34</sub>H<sub>50</sub>O<sub>13</sub>SSi: C, 56.18; H, 6.93. Found: C, 56.39; H, 6.79.

**6-O-[6'-O-[6''-O-(benzyl)-4''-O-acetyl-2'',3''-dideoxy- $\alpha$ -D-threo-hex-2''-enopyranosyl]-4'-O-acetyl-2',3'-dideoxy- $\alpha$ -D-threo-hex-2'-enopyranosyl]-4-O-mesyl-3-O-(*t*-butyldimethylsilyl)-D-glucal (18-diAc)**

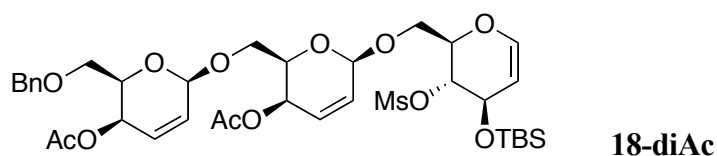

Following the same procedure previously used for the preparation of *O*-glycoside **15-Ac**, the treatment at 0°C of a solution of *O*-glycoside **18-Ac** (0.040 g, 0.055 mmol) in anhydrous pyridine (0.6 mL) with Ac<sub>2</sub>O (0.12 mL) afforded a crude product (0.042 g, 99% yield) consisting of diacetate **18-diAc**, practically pure as a liquid:  $[\alpha]_D^{20}$  -117.3 (*c* 0.6, CHCl<sub>3</sub>); *R<sub>f</sub>* = 0.22 (6:4 hexane/AcOEt); FTIR (neat film)  $\bar{\nu}$  1739, 1568, 1464, 1383, 1238, 1186, 1080, 1053, 968 cm<sup>-1</sup>. <sup>1</sup>H NMR (CDCl<sub>3</sub>)  $\delta$  7.27-7.38 (m, 5H), 6.37 (d, 1H, *J* = 6.0 Hz), 6.04-6.14 (m, 2H), 6.00 (d, 1H, *J* = 10.2 Hz), 5.93 (d, 1H, *J* = 10.2 Hz), 5.16 (s, 2H), 5.08-5.13 (m, 1H), 5.02-5.07 (m, 1H), 4.73-4.81 (m, 2H), 4.60 (d, 1H, *J* = 12.0 Hz), 4.48 (d, 1H, *J* = 12.0 Hz), 4.29-4.40 (m, 2H), 4.11 (dd, 1H, *J* = 11.4, 2.8 Hz), 3.88-4.05 (m, 4H), 3.76-3.86 (m, 1H), 3.59-3.69 (m, 2H), 3.08 (s, 3H), 2.04 (s, 3H), 2.00 (s, 3H), 0.90 (s, 9H), 0.12 (s, 6H). <sup>13</sup>C NMR (CDCl<sub>3</sub>)  $\delta$  170.6, 143.7, 138.2, 132.7, 132.5, 128.6, 128.0, 127.9, 126.9, 126.8, 102.0, 98.1, 98.0, 77.5, 77.4, 75.6, 73.7, 73.0, 72.8, 68.9, 67.5, 66.7, 65.4, 64.3, 64.2, 39.2, 32.1, 29.9, 26.0, 21.1, 21.0, 18.2, 1.2, -4.2, -4.3. Anal. Calcd for C<sub>36</sub>H<sub>52</sub>O<sub>14</sub>SSi: C, 56.23; H, 6.82. Found: C, 56.12; H, 6.54.

**6-*O*-[6'-*O*-[6''-*O*-(benzyl)-4''-*O*-acetyl-2'',3''-dideoxy- $\beta$ -D-*threo*-hex-2''-enopyranosyl]-4'-*O*-acetyl-2',3'-dideoxy- $\beta$ -D-*threo*-hex-2'-enopyranosyl]-4-*O*-mesyl-D-glucal (**19-diAc**)**

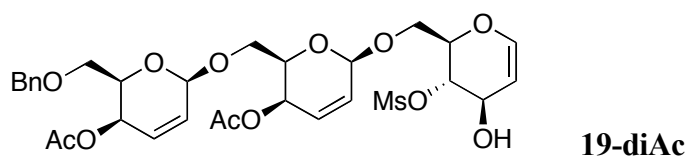

Following the same procedure used for the preparation of *trans* hydroxy mesylate **16-Ac**, the treatment of a solution of mesylate **18-diAc** (0.046 g, 0.060 mmol) in anhydrous THF (3 mL) with 1M TBAF in THF (0.06 mL) afforded, after 40 min at 0°C, a crude product (0.040 g) consisting of hydroxy mesylate **19-diAc** (<sup>1</sup>H NMR) which was subjected to flash chromatography. Elution with a 3:7 hexane/AcOEt mixture yielded hydroxy mesylate **19-diAc** (0.029 g, 74% yield), pure as a liquid:  $[\alpha]_D^{20}$  -132.9 (*c* 1.1, CHCl<sub>3</sub>); *R<sub>f</sub>* = 0.31 (3:7 hexane/AcOEt); FTIR (neat film)  $\bar{\nu}$  3398, 1739, 1655, 1469, 1377, 1238, 1178, 1069, 960 cm<sup>-1</sup>. <sup>1</sup>H NMR (CDCl<sub>3</sub>)  $\delta$  7.28-7.35 (m, 5H), 6.38 (dd, 1H, *J* = 6.0, 1.5 Hz), 6.04-6.13 (m, 2H),

6.01 (d, 1H,  $J = 10.1$  Hz), 5.94 (d, 1H,  $J = 10.1$  Hz), 5.18 (s, 2H), 5.07-5.13 (m, 1H), 5.02-5.07 (m, 1H), 4.88 (dd, 1H,  $J = 9.3, 6.8$  Hz), 4.79 (dd, 1H,  $J = 6.0, 2.6$  Hz), 4.58 (d, 1H,  $J = 12.0$  Hz), 4.49 (d, 1H,  $J = 12.0$  Hz), 4.46-4.50 (m, 1H), 4.21 (dd, 1H,  $J = 11.2, 2.6$  Hz), 3.91-4.16 (m, 5H), 3.78-3.90 (m, 2H), 3.58-3.69 (m, 2H), 3.20 (s, 3H), 2.03 (s, 3H), 1.99 (s, 3H).  $^{13}\text{C}$  NMR ( $\text{CDCl}_3$ )  $\square$  170.7, 170.6, 144.8, 138.0, 132.6, 132.3, 128.6, 128.0, 127.9, 126.9, 126.8, 102.4, 98.0, 97.9, 78.8, 75.0, 73.7, 73.0, 72.7, 68.9, 67.8, 67.7, 66.2, 64.3, 64.2, 39.0, 21.2. Anal. Calcd for  $\text{C}_{30}\text{H}_{38}\text{O}_{14}$ : C, 55.04; H, 5.85. Found: C, 54.87; H, 5.71.

***t*-Butyl 6-*O*-[6'-*O*-[6''-*O*-(benzyl)-4''-*O*-acetyl-2'',3''-dideoxy- $\square$ -D-*threo*-hex-2''-enopyranosyl]-4'-*O*-acetyl-2',3'-dideoxy- $\square$ -D-*threo*-hex-2'-enopyranosyl]-2,3-dideoxy- $\square$ -D-*threo*-hex-2-enopyranoside (5-diAc)**

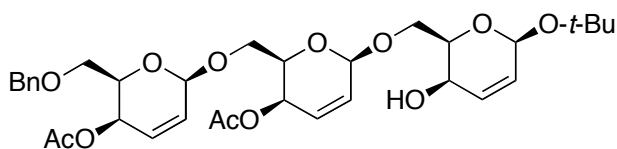

**5-diAc**

A solution of *trans* hydroxy mesylate **19-diAc** (0.023 g, 0.035 mmol) in a 1:1 anhydrous *t*-BuOH/anhydrous MeCN mixture (0.8 mL) was treated with *t*-BuOK (0.005 g, 0.044 mmol, 1.3 equiv) and the reaction mixture was stirred 18 h at room temperature. Dilution with  $\text{Et}_2\text{O}$  and evaporation of the washed (saturated aqueous NaCl) organic solution afforded a crude product consisting of *t*-butyl  $\square$ -*O*-glycoside **5-diAc** (disaccharide **5-diAc**) (0.021 g, 94% yield), practically pure as a liquid:  $[\alpha]_{\text{D}}^{20} -117.8$  ( $c$  1.0,  $\text{CHCl}_3$ );  $R_f = 0.36$  (4:6 hexane/AcOEt); FTIR (neat film)  $\square$  3439, 1739, 1456, 1377, 1178, 1238, 1118, 1053  $\text{cm}^{-1}$ .  $^1\text{H}$  NMR ( $\text{CDCl}_3$ )  $\square$  7.32 (s, 5H), 5.99-6.15 (m, 3H), 5.95 (dd, 2H,  $J = 10.1, 4.4$  Hz), 5.75 (d, 1H,  $J = 10.1$  Hz), 5.20 (s, 1H), 5.17 (s, 2H), 5.07-5.13 (m, 1H), 4.99-5.06 (m, 1H), 4.59 (d, 1H,  $J = 12.0$  Hz), 4.49 (d, 1H,  $J = 12.0$  Hz), 3.72-4.17 (m, 10H), 3.54-3.68 (m, 2H), 2.04 (s, 3H), 1.99 (s, 3H), 1.28 (s, 9H).  $^{13}\text{C}$  NMR ( $\text{CDCl}_3$ )  $\square$  170.7, 170.6, 144.8, 138.0, 132.6, 132.3, 128.6, 128.0, 127.9, 126.9, 126.8, 102.4, 98.0, 97.9, 78.8, 75.0, 73.7, 73.0, 72.7, 68.9, 67.8, 67.7, 66.2, 64.3, 64.2, 39.0, 21.2. Anal. Calcd. for  $\text{C}_{33}\text{H}_{44}\text{O}_{12}$ : C, 62.65; H, 7.01. Found: C, 62.48; H, 6.69.

***t*-Butyl 6-*O*-[6'-*O*-[6''-*O*-(benzyloxy)-4''-*O*-acetyl-2'',3''-dideoxy- $\square$ -D-*threo*-hex-2''-enopyranosyl]-4'-*O*-acetyl-2',3'-dideoxy- $\square$ -D-*threo*-hex-2'-enopyranosyl]-4-*O*-acetyl-2,3-dideoxy- $\square$ -D-*threo*-hex-2-enopyranoside (5-triAc)**

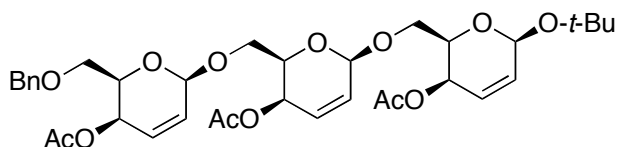

**5-triAc**

Following the typical procedure, a solution of *t*-butyl  $\beta$ -*O*-glycoside **5-diAc** (0.021 g, 0.033 mmol) in anhydrous pyridine (0.21 mL) was treated at 0°C with Ac<sub>2</sub>O (55  $\mu$ L) and the reaction was stirred at room temperature for 16 h. Dilution with toluene and evaporation of the organic solution afforded a crude product (0.022 g, 97% yield) consisting of *t*-butyl  $\beta$ -*O*-glycoside **5-triAc** (trisaccharide **5-triAc**), practically pure as a liquid:  $[\alpha]_D^{20}$  -206.1 (*c* 0.6, CHCl<sub>3</sub>); *R<sub>f</sub>* = 0.62 (4:6 hexane/AcOEt); FTIR (neat film)  $\nu$  1739, 1731, 1373, 1176, 1165, 1122, 1053 cm<sup>-1</sup>. <sup>1</sup>H NMR (CDCl<sub>3</sub>)  $\delta$  7.27-7.38 (m, 5H), 5.96-6.15 (m, 3H), 5.82-5.96 (m, 3H), 5.20 (s, 1H), 5.17 (broad s, 2H), 5.07-5.13 (m, 1H), 4.97-5.06 (m, 2H), 4.58 (d, 1H, *J* = 12.0 Hz), 4.49 (d, 1H, *J* = 12.0 Hz), 3.89-4.04 (m, 5H), 3.75-3.88 (m, 2H), 3.56-3.71 (m, 2H), 2.04 (s, 6H), 2.00 (s, 3H), 1.29 (s, 9H). <sup>13</sup>C NMR (CDCl<sub>3</sub>)  $\delta$  170.8, 170.7, 170.6, 138.0, 135.2, 132.7, 132.5, 129.2, 128.6, 128.4, 128.0, 127.9, 126.7, 125.9, 125.5, 98.2, 97.9, 92.7, 76.2, 73.7, 73.3, 72.9, 72.8, 68.9, 68.1, 67.5, 66.2, 64.2, 64.1, 64.0, 29.9, 28.8, 21.2, 21.1, 21.0. Anal. Calcd. for C<sub>35</sub>H<sub>46</sub>O<sub>13</sub>: C, 62.30; H, 6.87. Found: C, 62.11; H, 6.72. MS, Calcd for [C<sub>35</sub>H<sub>46</sub>O<sub>13</sub> + Na<sup>+</sup>] = 697.3. Found 597.2.

***t*-Butyl 6-*O*-[6'-*O*-[6''-*O*-(benzyloxy)-2'',3''-dideoxy- $\beta$ -D-*threo*-hex-2''-enopyranosyl]-2',3'-dideoxy- $\beta$ -D-*threo*-hex-2'-enopyranosyl]-2,3-dideoxy- $\beta$ -D-*threo*-hex-2-enopyranoside (5)**

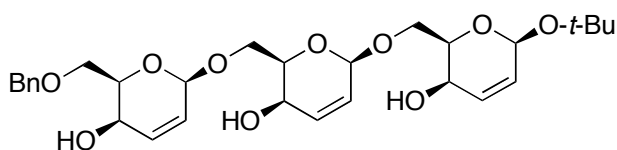

**5**

a) A solution of disaccharide **5-diAc** (0.020 g, 0.032 mmol) in MeOH (0.5 mL) was treated with MeONa (0.004 g, 0.032 mmol) and the reaction mixture was stirred 18 h at room temperature. Dilution with Et<sub>2</sub>O and evaporation of the washed (saturated aqueous NaCl) organic solution afforded a crude liquid product (0.017 g, 97% yield) consisting of *t*-butyl  $\beta$ -*O*-glycoside **5** (trisaccharide **5**) (<sup>1</sup>H NMR), practically pure as a liquid:  $[\alpha]_D^{20}$  -39.2 (*c* 0.5, CHCl<sub>3</sub>); *R<sub>f</sub>* = 0.27 (3.6:6:0.4 hexane/AcOEt/MeOH); FTIR (neat film)

$\nu$  3423, 1643, 1369, 1118, 1051  $\text{cm}^{-1}$ .  $^1\text{H}$  NMR ( $\text{CDCl}_3$ )  $\delta$  7.29-7.30 (m, 5H), 6.11-6.16 (m, 2H), 6.07 (dd, 1H,  $J = 10.2, 3.6$  Hz), 5.88 (d, 1H,  $J = 10.2$  Hz), 5.86 (d, 1H,  $J = 10.2$  Hz), 5.76 (d, 1H,  $J = 10.2$  Hz), 5.21 (s, 1H), 5.17 (s, 1H), 5.14 (s, 1H), 4.61 (d, 1H,  $J = 12.0$  Hz), 4.58 (d, 1H,  $J = 12.0$  Hz), 3.71-4.10 (m, 10H), 1.30 (s, 9H).  $^{13}\text{C}$  NMR ( $\text{CDCl}_3$ )  $\delta$  138.1, 133.2, 131.1, 130.9, 130.7, 130.6, 130.1, 128.6, 128.1, 128.0, 98.8, 98.6, 93.0, 77.4, 75.0, 74.7, 74.4, 73.8, 69.9, 69.0, 68.5, 62.8, 62.5, 62.1, 29.9, 28.9. Anal. Calcd for  $\text{C}_{29}\text{H}_{40}\text{O}_{10}$ : C, 63.49; H, 7.35. Found: C, 63.80; H, 6.99. MS Calcd for  $[\text{C}_{29}\text{H}_{40}\text{O}_{10} + \text{Cl}^-]$ : 583.2. Found 583.3.

b) A solution of *t*-butyl trisaccharide **5-triAc** (0.020 g, 0.030 mmol) in MeOH (0.5 mL) was treated with MeONa (0.004 g, 0.074 mmol) and the reaction mixture was stirred 18 h at room temperature. Dilution with  $\text{Et}_2\text{O}$  and evaporation of the washed (saturated aqueous NaCl) organic solution afforded a crude liquid product (0.016 g, 97% yield) consisting of trisaccharide **5**, practically pure as a liquid.

**Synthesis of trisaccharide 5 through non-acetylated compounds  
(Scheme 9)**

**Scheme 9**

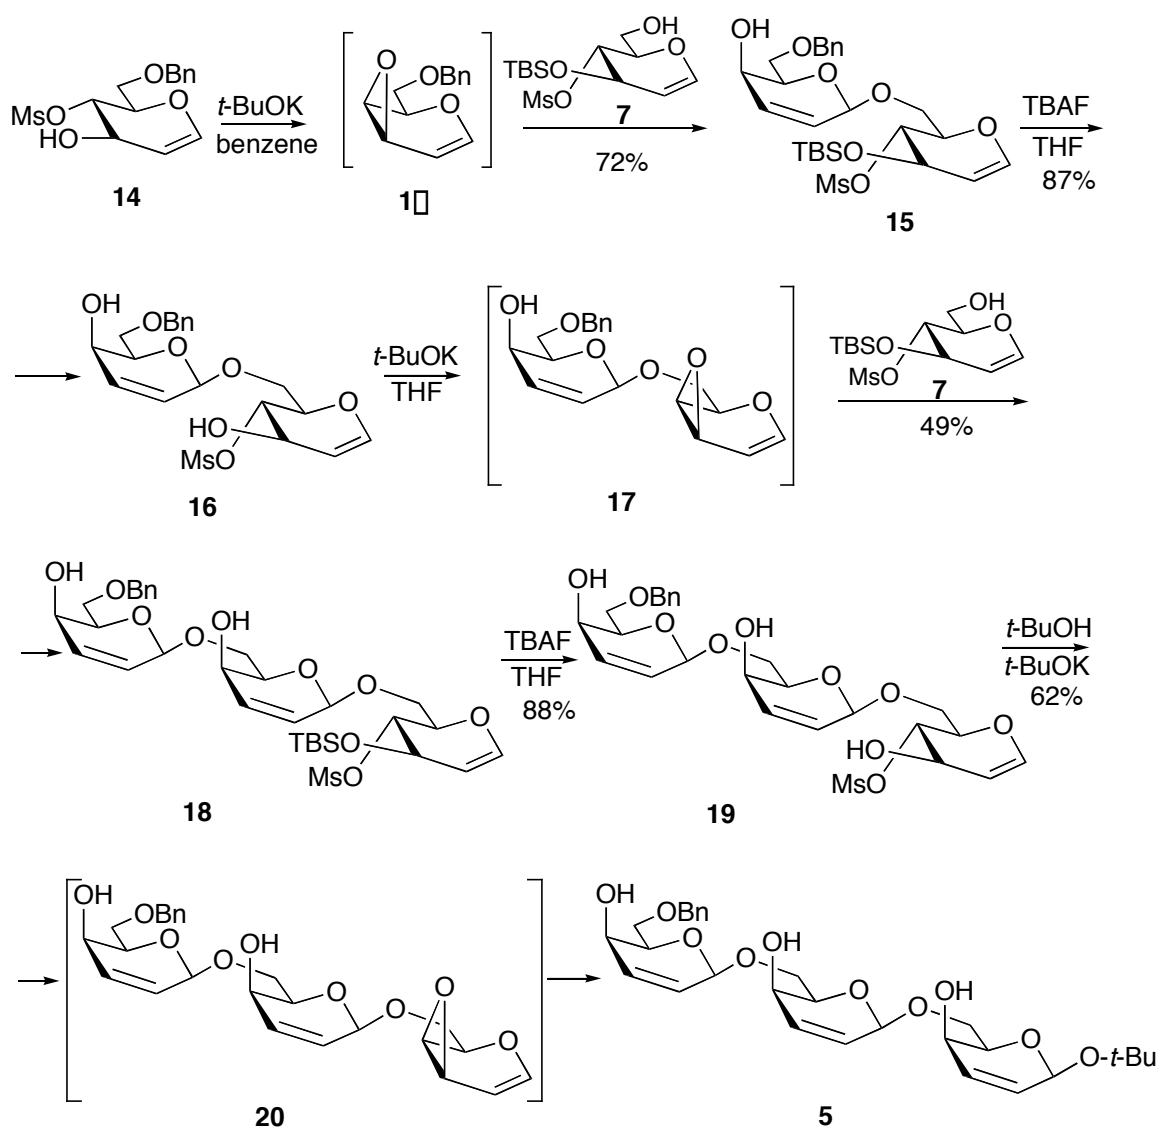

**6-O-[6'-O-(benzyl)-2',3'-dideoxy- $\beta$ -D-threo-hex-2'-enopyranosyl]-4-O-mesyl-D-glucal  
(16)**

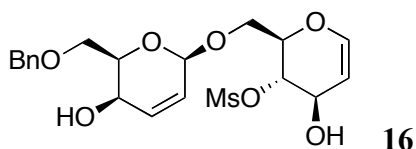

A solution of  $\alpha$ -*O*-glycoside **15**, prepared as described above, (0.117 g, 0.21 mmol) in anhydrous THF (10 mL) was treated at 0°C with 1M TBAF in THF (0.21 mL). After 30 min stirring at the same temperature, dilution with Et<sub>2</sub>O and evaporation of the washed (saturated aqueous NaCl) organic solution afforded a crude product (0.081 g, 87% yield) consisting of *trans* hydroxy mesylate **16**, sufficiently pure to be utilized in the next step without any further purification. An analytical sample of crude **16** was subjected to flash chromatography. Elution with a 3:7 hexane/AcOEt mixture afforded pure *trans* hydroxy mesylate **16**, as a liquid:  $[\alpha]_D^{20}$  -23.3 (*c* 0.5, CHCl<sub>3</sub>);  $R_f$  = 0.20 (3:7 hexane/AcOEt); FTIR (neat film)  $\nu$  3421, 1639, 1464, 1344, 1263, 1174, 1087, 1031 cm<sup>-1</sup>. <sup>1</sup>H NMR (CDCl<sub>3</sub>)  $\delta$  7.35 (s, 5H), 6.29 (dd, 1H, *J* = 6.0, 1.5 Hz), 6.03 (ddd, 1H, *J* = 10.0, 5.0, 1.1 Hz), 5.83 (d, 1H, *J* = 10.0 Hz), 5.06 (d, 1H, *J* = 1.1 Hz), 4.84 (dd, 1H, *J* = 9.0, 6.7 Hz), 4.70 (dd, 1H, *J* = 6.0, 2.7 Hz), 4.53 (d, 1H, *J* = 12.0 Hz), 4.48 (d, 1H, *J* = 12.0 Hz), 4.29-4.35 (m, 1H), 4.15 (dd, 1H, *J* = 11.2, 2.8 Hz), 4.05-4.16 (m, 1H), 3.67-3.97 (m, 5H), 3.19 (s, 3H). <sup>13</sup>C NMR (CDCl<sub>3</sub>)  $\delta$  144.7, 137.9, 131.1, 130.5, 128.6, 128.0, 102.2, 98.6, 78.5, 75.0, 74.7, 73.7, 70.0, 67.6, 66.5, 63.0, 38.9. Anal. Calcd for C<sub>20</sub>H<sub>26</sub>O<sub>9</sub>S: C, 54.29; H, 5.92. Found: C, 54.54; H, 5.99.

**6-*O*-[6'-*O*-[6''-*O*-(benzyl)-2'',3''-dideoxy- $\alpha$ -D-threo-hex-2''-enopyranosyl]-2',3'-dideoxy- $\alpha$ -D-threo-hex-2'-enopyranosyl]-4-*O*-mesyl-3-*O*-(*t*-butyldimethylsilyl)-D-glucal (**18**)**

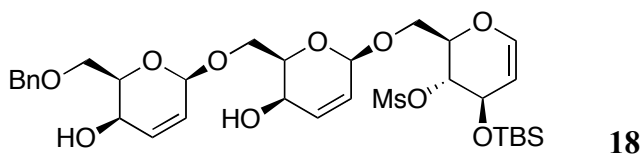

Following the procedure previously used for the preparation of  $\alpha$ -*O*-glycoside **15**, the treatment of a solution of *trans* hydroxy mesylate **16** (0.071 g, 0.16 mmol) in anhydrous THF (2 mL) with *t*-BuOK (0.019 g, 0.17 mmol) in the presence of alcohol **7** (0.108 g, 0.32 mmol, 2 equiv) afforded, after 18 h stirring at room temperature, a crude product (0.185 g) consisting of  $\alpha$ -*O*-glycoside **18** and unreacted alcohol **7** (<sup>1</sup>H NMR), which was subjected to flash chromatography. Elution with a 4:6 hexane/AcOEt mixture yielded  $\alpha$ -*O*-glycoside **18** (0.054 g, 49% yield), pure as a liquid:  $R_f$  = 0.16 (4:6 hexane/AcOEt); FTIR (neat film)  $\nu$  3421, 1655, 1467, 1361, 1257, 1180, 1109, 1055, 960 cm<sup>-1</sup>. <sup>1</sup>H NMR (CDCl<sub>3</sub>)  $\delta$  7.28-7.41 (m, 5H), 6.38

(dd, 1H,  $J = 6.3, 0.9$  Hz), 6.09-6.18 (m, 2H), 5.88 (t, 2H,  $J = 10.0$  Hz), 5.12-5.18 (m, 2H), 4.74-4.82 (m, 2H), 4.63 (d, 1H,  $J = 12.0$  Hz), 4.55 (d, 1H,  $J = 12.0$  Hz), 4.28-4.41 (m, 2H), 3.68-4.15 (m, 10H), 3.09 (s, 3H), 0.90 (s, 9H), 0.12 (s, 6H).  $^{13}\text{C}$  NMR ( $\text{CDCl}_3$ )  $\delta$  143.7, 138.1, 131.0, 130.9, 130.8, 130.7, 128.0, 128.0, 127.9, 101.9, 98.6, 98.5, 77.4, 75.6, 74.5, 73.8, 69.7, 68.3, 66.6, 65.4, 62.9, 62.2, 39.2, 29.9, 25.9, 18.2, -4.2, -4.3. Anal. Calcd for  $\text{C}_{32}\text{H}_{48}\text{O}_{12}\text{SSi}$ : C, 56.12; H, 7.06. Found: C, 56.34; H, 7.41.

**6-*O*-[6'-*O*-[6''-*O*-(benzyl)-2'',3''-dideoxy- $\beta$ -D-threo-hex-2''-enopyranosyl]-2',3'-dideoxy- $\beta$ -D-threo-hex-2'-enopyranosyl]-4-*O*-mesyl-D-glucal (**19**)**

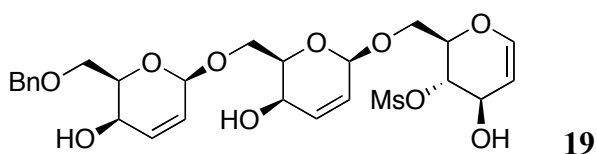

Following the same procedure previously used for the preparation of *trans* hydroxy mesylate **16**, the treatment of a solution of  $\beta$ -*O*-glycoside **18** (0.035 g, 0.052 mmol) in anhydrous THF (3 mL) with 1M TBAF in THF (52  $\mu\text{L}$ ) afforded, after 30 min at  $0^\circ\text{C}$ , a crude product (0.026 g, 88% yield) consisting of *trans* hydroxy mesylate **19**, sufficiently pure to be used in the next step without any further purification:  $R_f = 0.32$  (3:6:1 hexane/AcOEt/MeOH); FTIR (neat film)  $\delta$  3393, 1467, 1384, 1190, 1089, 972  $\text{cm}^{-1}$ .  $^1\text{H}$  NMR ( $\text{CDCl}_3$ )  $\delta$  7.27-7.34 (m, 5H), 6.28 (d, 1H,  $J = 6.0$  Hz), 6.00-6.16 (m, 2H), 5.72-5.92 (m, 2H), 5.03-5.16 (m, 2H), 4.80-4.90 (m, 1H), 4.54 (s, 2H), 3.63-4.27 (m, 13H), 3.26 (s, 3H).

**Trisaccharide 5**

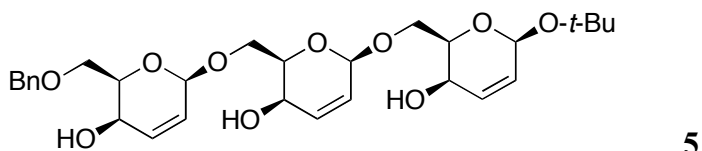

A solution of *trans* hydroxy mesylate **19** (0.020 g, 0.035 mmol) in anhydrous *t*-BuOH (0.5 mL) was treated with *t*-BuOK (0.005 g, 0.044 mmol) and the reaction mixture was stirred 18 h at room temperature. Dilution with  $\text{Et}_2\text{O}$  and evaporation of the washed (saturated aqueous NaCl) organic solution afforded a crude product (0.018 g) consisting of *t*-butyl  $\beta$ -*O*-glycoside **5** (trisaccharide **5**) ( $^1\text{H}$  NMR), which was subjected to flash chromatography. Elution with a



3.6:6:0.4 hexane/AcOEt/MeOH mixture afforded trisaccharide **5** (0.012 g, 62% yield), pure as a liquid.

## Synthesis of glycosyl acceptor **21** (Scheme 5, text)

### 6-*O*-(2-Tetrahydropyranyl)-4-*O*-mesyl-D-glucal (**22**)

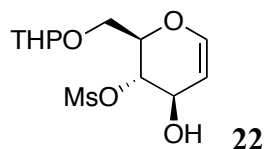

Following the same procedure previously used for the preparation of *trans* hydroxy mesylate **16**, the treatment of a solution of mesylate **13** (1.0 g, 2.37 mmol) in anhydrous THF (83 mL) with 1M TBAF in THF (2.37 mL) afforded, after 45 min at 0°C, a crude product (0.82 g) consisting of **22**, which was subjected to flash chromatography. Elution with a 1:1 hexane/AcOEt mixture yielded *trans* hydroxy mesylate **22** (0.55 g, 75% yield), pure as a liquid:  $R_f = 0.20$  (1:1 hexane/AcOEt); FTIR (neat film)  $\square$  3421, 1639, 1464, 1344, 1263, 1174, 1087, 1031, 962  $\text{cm}^{-1}$ .  $^1\text{H}$  NMR ( $\text{CDCl}_3$ )  $\square$  6.37 (d, 1H,  $J = 5.9$  Hz), 4.72-4.85 (m, 2H), 4.58-4.65 (m, 1H), 4.38-4.46 (m, 1H), 3.59-4.12 (m, 4H), 3.39-4.58 (m, 2H), 3.19 and 3.17 (two singlets corresponding to two diastereoisomers, complexive 3H), 1.40-1.88 (m, 6H).  $^{13}\text{C}$  NMR ( $\text{CDCl}_3$ )  $\square$  144.7, 144.5, 108.2, 102.5, 102.4, 99.6, 99.5, 99.4, 98.6, 79.5, 79.2, 75.3, 75.1, 67.4, 67.3, 65.5, 65.4, 63.4, 62.7, 62.4, 38.9, 38.6, 31.0, 30.5, 30.3, 25.7, 25.5, 25.4, 19.9, 19.5, 19.4, -3.5. Anal. Calcd for  $\text{C}_{12}\text{H}_{20}\text{O}_7\text{S}$ : C, 46.74; H, 6.54. Found: C, 46.92; H, 6.59.

### 6-*O*-(2-Tetrahydropyranyl)-3-deoxy-3-azido-D-gulal (**23**)

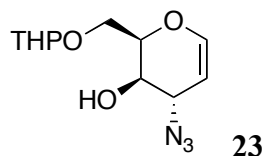

A solution of *trans* hydroxy mesylate **22** (0.191 g, 0.62 mmol) in anhydrous MeCN (12 mL) was treated with *t*-BuOK (0.070 g, 0.62 mmol) in the presence of tetramethylguanidinium azide (TMGA) (0.293 g, 1.85 mmol, 3 equiv) and the reaction mixture was stirred 30 min at room temperature. Dilution with  $\text{Et}_2\text{O}$  and evaporation of the washed (saturated aqueous NaCl) organic solution afforded a crude product (0.153 g, 97% yield) consisting of *trans* azido alcohol **23** which was used in the next step without any further purification. An analytical sample of crude **23** was subjected to flash chromatography. Elution with a 1:1 hexane/AcOEt mixture afforded pure *trans* azido alcohol **23**, as a liquid:  $R_f = 0.41$  (1:1 hexane/AcOEt); FTIR

(neat film)  $\square$  3458, 2104, 1655, 1357, 1026  $\text{cm}^{-1}$ .  $^1\text{H}$  NMR ( $\text{CDCl}_3$ )  $\square$  6.70 (d, 1H,  $J = 6.1$  Hz), 4.72-4.98 (m, 2H), 4.64 (d, 1H,  $J = 2.1$  Hz), 4.13-4.93 (m, 3H), 3.52 (dd, 3H,  $J = 10.2$ , 4.7 Hz), 3.19 (d, 1H,  $J = 4.7$  Hz), 1.44-1.84 (m, 6H).  $^{13}\text{C}$  NMR ( $\text{CDCl}_3$ )  $\square$  148.2, 110.3, 102.4, 99.4, 99.3, 98.7, 98.6, 95.2, 95.0, 72.1, 71.8, 68.6, 68.1, 67.8, 67.4, 63.5, 62.7, 62.4, 55.7, 55.6, 31.1, 30.5, 30.3, 29.8, 25.9, 25.8, 25.7, 25.6, 25.4, 25.3, 19.9, 19.5, 19.3, 9.7, 1.1.

### 6-*O*-(2-Tetrahydropyranyl)-3-deoxy-3-amino-D-gulal (**24**)

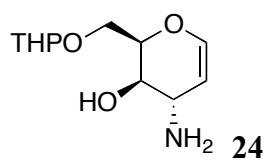

A solution of *trans* azido alcohol **23** (0.62 g, 2.43 mmol) in anhydrous THF (4.3 mL) was treated at  $0^\circ\text{C}$  with  $\text{LiAlH}_4$  (0.138 g, 3.65 mmol), added in two portions, and the reaction mixture was stirred for 3 h at room temperature. The reaction mixture was diluted with  $\text{Et}_2\text{O}$  and carefully treated with  $\text{H}_2\text{O}$  and 10% aqueous  $\text{NaOH}$  in order to destroy the excess of hydride. Evaporation of the filtered organic solvent afforded a crude product (0.517 g, 93% yield) consisting of *trans* amino alcohol **24**, practically pure as a liquid, which was used in the next step without any further purification:  $R_f = 0.11$  (9:1  $\text{CH}_2\text{Cl}_2/\text{MeOH}$ ); FTIR (neat film)  $\square$  3360, 1641, 1595, 1464, 1377, 1251, 1118, 1080, 1033  $\text{cm}^{-1}$ .  $^1\text{H}$  NMR ( $\text{CDCl}_3$ )  $\square$  6.59 (d, 1H,  $J = 6.0$  Hz), 4.93-5.04 (m, 1H), 4.59-4.71 (m, 1H), 4.27-4.43 (m, 2H), 3.96-4.10 (m, 1H), 3.69-3.93 (m, 3H), 3.41-3.57 (m, 1H), 1.31-1.87 (m, 8H).  $^{13}\text{C}$  NMR ( $\text{CDCl}_3$ )  $\square$  145.4, 129.2, 127.5, 127.1, 108.1, 100.9, 100.8, 99.6, 99.5, 99.4, 99.3, 99.1, 72.1, 71.7, 71.6, 70.9, 70.2, 67.5, 62.6, 62.4, 47.8, 30.6, 30.4, 25.3, 20.9, 19.5, 19.4.

### 6-*O*-(2-Tetrahydropyranyl)-3-deoxy-3-(*N*-nosylamino)-D-gulal (**25**)

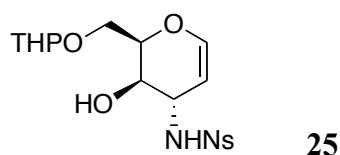

A solution of *trans* amino alcohol **24** (0.426 g, 1.85 mmol) in anhydrous  $\text{CH}_2\text{Cl}_2$  (8 mL) was treated with  $\text{NsCl}$  (0.448 g, 2.04 mmol) in the presence of  $\text{Et}_3\text{N}$  (0.28 mL, 2.04 mmol) and the reaction mixture was stirred 4 h at room temperature. Dilution with  $\text{CH}_2\text{Cl}_2$  and evaporation of the washed (saturated aqueous  $\text{NaHCO}_3$  and saturated aqueous  $\text{NaCl}$ ) organic solution

afforded a crude product (0.75 g, 98% yield) consisting of *trans* *N*-nosylamino alcohol **25**, sufficiently pure to be utilized in the next step without any further purification. An analytical sample of crude **25** was purified by flash chromatography. Elution with a 2:4:4 hexane/AcOEt/CH<sub>2</sub>Cl<sub>2</sub> mixture afforded pure **25** as a semisolid:  $R_f = 0.43$  (1:1 CH<sub>2</sub>Cl<sub>2</sub>/AcOEt); FTIR (neat film)  $\bar{\nu}$  3458, 1655, 1535, 1450, 1244, 1033 cm<sup>-1</sup>. <sup>1</sup>H NMR (CDCl<sub>3</sub>)  $\delta$  8.15-8.25 (m, 1H), 7.94-7.92 (m, 1H), 7.71-7.82 (m, 2H), 6.54 (d, 1H,  $J = 5.9$  Hz), 5.93 (broad s, 1H, NH), 4.61-4.69 (m, 1H), 4.50 (t, 1H,  $J = 5.7$  Hz), 3.33-4.24 (m, 8H), 1.43-1.82 (m, 6H). <sup>13</sup>C NMR (CDCl<sub>3</sub>)  $\delta$  148.1, 148.0, 134.1, 133.7, 133.5, 133.2, 131.5, 131.4, 125.7, 99.3, 96.4, 71.5, 71.3, 70.1, 69.3, 68.3, 67.6, 62.6, 60.5, 50.2, 50.1, 30.4, 30.2, 29.8, 25.2, 19.4, 19.3. Anal. Calcd for C<sub>17</sub>H<sub>22</sub>N<sub>2</sub>O<sub>8</sub>S: C, 49.27; H, 5.35; N, 6.76. Found: C, 49.04; H, 5.67; N, 7.00.

### 3-Deoxy-3-(*N*-nosylamino)-D-gulal (**21**)

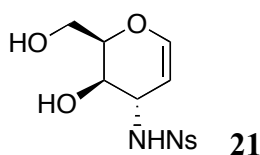

A solution of *trans* *N*-nosylamino alcohol **25** (0.360 g, 0.87 mmol) in absolute EtOH (7 mL) was treated with PPTS (0.022 g, 0.087 mmol) and the reaction mixture was carefully stirred at 35°C for 18 h. After dilution with CH<sub>2</sub>Cl<sub>2</sub>, solid NaHCO<sub>3</sub> was added under stirring in order to have a slightly alkaline solution. After 20 min stirring at room temperature, the suspension was filtered and the organic solution evaporated to dryness to give a crude solid product consisting of 1,3-diol **21** (0.282 g, 99% yield) which was subjected to flash chromatography. Elution with 1:1 CH<sub>2</sub>Cl<sub>2</sub>/AcOEt mixture afforded pure diol **21** (0.244 g, 85% yield), as a solid, mp 136-138°C:  $[\alpha]_D^{20} +121.9$  ( $c$  0.9, MeOH);  $R_f = 0.21$  (1:1 CH<sub>2</sub>Cl<sub>2</sub>/AcOEt); FTIR (nujol)  $\bar{\nu}$  3346, 2723, 1645, 1455 cm<sup>-1</sup>. <sup>1</sup>H NMR (CD<sub>3</sub>CN)  $\delta$  8.07-8.15 (m, 1H), 7.80-7.89 (m, 3H), 6.49 (d, 1H,  $J = 6.0$  Hz), 5.98 (broad s, 1H, NH), 4.49 (ddd, 1H,  $J = 6.1, 5.3, 1.8$  Hz), 3.84-3.90 (m, 1H), 3.77-3.84 (m, 1H), 3.69-3.76 (m, 1H), 3.54 (dd, 1H,  $J = 5.2, 2.3$  Hz), 3.46 (d, 2H,  $J = 5.2$  Hz), 3.05 (t, 1H,  $J = 5.6$  Hz). <sup>13</sup>C NMR (CD<sub>3</sub>CN)  $\delta$  147.9, 135.3, 134.4, 134.0, 131.5, 126.1, 97.5, 74.3, 69.4, 62.5, 51.3. Anal. Calcd for C<sub>12</sub>H<sub>14</sub>N<sub>2</sub>O<sub>7</sub>S: C, 43.64; H, 4.27; N, 8.48. Found: C, 43.82; H, 4.50; N, 8.88.

## Synthesis of trisaccharide 6

(Scheme 6, text)

**6-*O*-[6'-*O*-(benzyl)-2',3',4'-trideoxy-4-*N*-(nosylamino)- $\beta$ -D-erythro-hex-2'-enopyranosyl]-3-deoxy-3-*N*-(nosylamino)-D-gulal (27)**

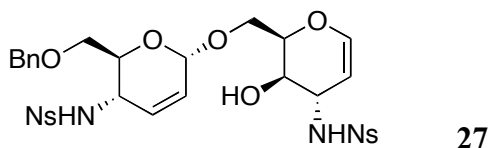

A solution of *trans* *N*-nosyl-*O*-mesylate **26** (0.201 g, 0.48 mmol)<sup>4</sup> in anhydrous MeCN (28 mL) was treated with K<sub>2</sub>CO<sub>3</sub> (0.20 g, 1.45 mmol, 3 equiv) in the presence of diol **21** (0.317g, 0.96 mmol, 2 equiv) and the reaction mixture was stirred at room temperature for 16 h. Dilution with AcOEt and evaporation of the washed (saturated aqueous NaCl) organic solution afforded a crude product (0.515 g) consisting of  $\beta$ -*O*-glycoside **27** and unreacted alcohol **21** (<sup>1</sup>H NMR), which was subjected to flash chromatography. Elution with a 2:8 hexane/AcOEt mixture yielded  $\beta$ -*O*-glycoside **27** (0.260 g, 74% yield), pure as a liquid: [ $\alpha$ ]<sub>D</sub><sup>20</sup> +121.2 (*c* 0.1, CHCl<sub>3</sub>); R<sub>f</sub> = 0.36 (2:8 hexane/AcOEt); FTIR (neat film)  $\nu$  3367, 1597, 1462, 1384, 1261, 1194, 1076 cm<sup>-1</sup>. <sup>1</sup>H NMR (CD<sub>3</sub>CN)  $\delta$  8.02-8.13 (m, 2H), 7.68-7.87 (m, 6H), 7.21-7.39 (m, 5H), 6.44 (d, 1H, *J* = 6.2 Hz), 5.94-6.23 (m, 2H, NH), 5.73 (dt, 1H, *J* = 10.2, 2.5 Hz), 5.58 (d, 1H, *J* = 10.7 Hz), 4.97-5.06 (m, 1H), 3.32-4.64 (m, 13H). <sup>13</sup>C NMR (CD<sub>3</sub>CN)  $\delta$  144.8, 139.5, 135.4, 134.4, 134.3, 134.0, 133.3, 131.7, 131.6, 131.5, 131.4, 129.3, 128.6, 128.5, 128.2, 126.1, 126.0, 97.6, 95.2, 73.8, 70.0, 69.8, 69.0, 68.1, 61.0, 51.2, 49.6. Anal. Calcd for C<sub>31</sub>H<sub>32</sub>N<sub>4</sub>O<sub>13</sub>S<sub>2</sub>: C, 52.84; H, 4.58; N, 3.98. Found: C, 53.01; H, 4.22; N, 3.69.

**6-*O*-[6'-*O*-(benzyl)-2',3',4'-trideoxy-4-*N*-(nosylamino)- $\beta$ -D-erythro-hex-2'-enopyranosyl]-4-*O*-mesyl-3-deoxy-3-*N*-(nosylamino)-D-gulal (28)**

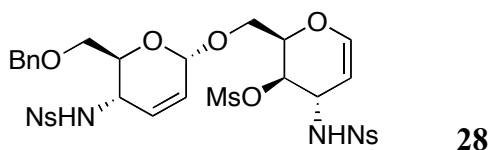

Following the same procedure previously used for the preparation of mesylate **13**, the treatment of a solution of  $\beta$ -*O*-glycoside **27** (0.302 g, 0.41 mmol) in anhydrous CH<sub>2</sub>Cl<sub>2</sub> (3.0 mL) in the presence of anhydrous pyridine (0.1 mL, 1.24 mmol) with MsCl (0.06 mL, 0.82

mmol) afforded, after 16 h stirring at 0°C, a crude product consisting of mesylate **28** (0.312 g, 94% yield), sufficiently pure to be used in the next step without any further purification. An analytical sample of crude **28** was subjected to flash chromatography. Elution with a 4:6 hexane/AcOEt mixture afforded pure mesylate **28**, as a liquid:  $[\alpha]_D^{20} +93.2$  (*c* 0.5, CHCl<sub>3</sub>);  $R_f = 0.22$  (4:6 hexane/AcOEt); FTIR (neat film)  $\nu$  3327, 1543, 1462, 1363, 1172, 1060, 960 cm<sup>-1</sup>. <sup>1</sup>H NMR (CD<sub>3</sub>CN)  $\delta$  8.02-8.15 (m, 2H), 7.66-7.96 (m, 6H), 7.23-7.41 (m, 5H), 6.53 (d, 1H, *J* = 5.9 Hz), 6.24-6.31 (m, 1H, NH), 6.16-6.24 (m, 1H, NH), 5.71 (dt, 1H, *J* = 10.2, 2.4 Hz), 5.54-5.63 (m, 1H), 4.98-5.03 (m, 1H), 4.83-4.89 (m, 1H), 4.60 (ddd, 1H, *J* = 6.1, 5.4, 1.8 Hz), 4.43 (d, 1H, *J* = 12.0 Hz), 4.35 (d, 1H, *J* = 12.0 Hz), 3.86-4.33 (m, 5H), 3.10 (s, 3H). <sup>13</sup>C NMR (CD<sub>3</sub>CN)  $\delta$  148.8, 138.1, 135.7, 135.4, 134.2, 134.0, 133.7, 132.0, 131.8, 131.7, 131.5, 129.3, 128.7, 128.5, 128.0, 126.4, 126.1, 97.0, 95.6, 75.8, 73.9, 75.1, 70.0, 69.9, 66.7, 49.6, 48.6, 38.6. Anal. Calcd for C<sub>32</sub>H<sub>34</sub>N<sub>4</sub>O<sub>15</sub>S<sub>3</sub>: C, 47.40; H, 4.23; N, 6.91. Found: C, 47.69; H, 4.60; N, 7.17.

**6-*O*-[6'-*O*-[6''-*O*-(benzyl)-2'',3'',4''-trideoxy-4''-*N*-(nosylamino)- $\beta$ -D-erythro-hex-2''-enopyranosyl]-2',3',4'-trideoxy-4'-*N*-(nosylamino)- $\beta$ -D-erythro-hex-2'-enopyranosyl]-3-deoxy-3-*N*-(nosylamino)-D-gulal (**30**)**

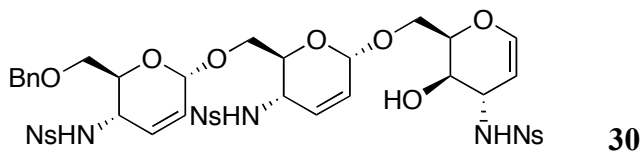

Following the same procedure previously used for the preparation of  $\beta$ -*O*-glycoside **27**, the treatment of a solution of *trans N*-nosyl-*O*-mesylate **28** (0.31 g, 0.38 mmol) in anhydrous MeCN (23 mL) with K<sub>2</sub>CO<sub>3</sub> (0.157 g, 1.14 mmol, 3 equiv) in the presence of diol **21** (0.376 g, 1.14 mmol, 3 equiv) afforded, after 24 h stirring at room temperature, a crude product (0.616 g) consisting of  $\beta$ -*O*-glycoside **30** and unreacted diol **21** (<sup>1</sup>H NMR), which was subjected to flash chromatography. Elution with a 9:1 CH<sub>2</sub>Cl<sub>2</sub>/acetone mixture yielded pure  $\beta$ -*O*-glycoside **30** (0.257 g, 65% yield), pure as a solid, mp 103-105°C:  $[\alpha]_D^{20} +153$  (*c* 0.5, CHCl<sub>3</sub>);  $R_f = 0.16$  (3:7 hexane/AcOEt); FTIR (nujol)  $\nu$  3298, 1647, 1539, 1458, 1375, 1344, 1257, 1174, 1122, 1060, 1043 cm<sup>-1</sup>. <sup>1</sup>H NMR (CD<sub>3</sub>CN)  $\delta$  8.01-8.15 (m, 3H), 7.75-7.91 (m, 9H), 7.22-7.41 (m, 5H), 6.46 (d, 1H, *J* = 5.6 Hz), 6.18 (d, 1H, *J* = 8.5 Hz, NH), 6.07 (d, 1H, *J* = 9.1 Hz, NH), 5.94 (d, 1H, *J* = 7.3 Hz, NH), 5.65-5.80 (m, 2H), 5.59 (d, 1H, *J* = 10.2 Hz), 5.48 (d, 1H, *J* = 10.2 Hz), 4.98 (d, 1H, *J* = 2.5 Hz), 4.94 (d, 1H, *J* = 2.5 Hz), 4.49 (ddd, 1H, *J* = 6.1, 5.4, 1.7 Hz), 4.38 (d, 1H, *J* = 12.0 Hz), 4.32 (d, 1H, *J* = 12.0 Hz), 4.09-4.22 (m, 1H), 3.84-4.08 (m,

6H), 3.65-3.83 (m, 3H), 3.52-3.64 (m, 3H), 3.39 (d, 1H,  $J = 6.0$  Hz).  $^{13}\text{C}$  NMR ( $\text{CD}_3\text{CN}$ )  $\square$  148.8, 148.7, 147.8, 139.6, 135.5, 135.4, 135.3, 134.6, 134.4, 134.2, 134.1, 134.0, 131.7, 131.6, 131.5, 131.4, 131.2, 129.3, 128.5, 128.4, 128.3, 126.2, 126.1, 126.0, 97.7, 95.1, 94.5, 73.7, 72.8, 69.8, 69.6, 69.0, 68.1, 67.5, 51.1, 50.0, 49.5, 30.9, 29.7. Anal. Calcd for  $\text{C}_{43}\text{H}_{44}\text{N}_6\text{O}_{19}\text{S}_3$ : C, 49.42; H, 4.24; N, 8.04. Found: C, 49.31; H, 4.39; N, 8.39.

**6-*O*-[6'-*O*-[6''-*O*-(benzyl)-2'',3'',4''-trideoxy-4''-*N*-(nosylamino)- $\square$ -D-erythro-hex-2''-enopyranosyl]-2',3',4'-trideoxy-4'-*N*-(nosylamino)- $\square$ -D-erythro-hex-2'-enopyranosyl]-4-*O*-mesyl-3-deoxy-3-*N*-(nosylamino)-D-gulal (**31**)**

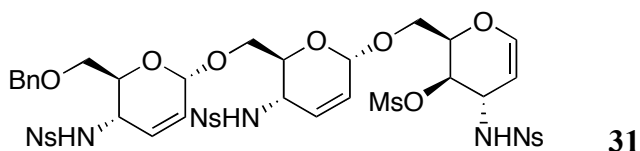

Following the same procedure previously used for the preparation of mesylate **13**, the treatment of a solution of  $\square$ -*O*-glycoside **30** (0.120 g, 0.11 mmol) in anhydrous  $\text{CH}_2\text{Cl}_2$  (2.0 mL) with  $\text{MsCl}$  (18.8  $\mu\text{L}$ , 0.24 mmol) in the presence of anhydrous pyridine (30.0  $\mu\text{L}$ , 0.36 mmol), afforded, after 16 h stirring at  $0^\circ\text{C}$ , a crude product (0.117 g, 95% yield) consisting of *trans N*-nosyl-*O*-mesylate **31**, sufficiently to be used in the next step without any further purification. An analytical sample of crude **31** was subjected to flash chromatography. Elution with a 95:5  $\text{CH}_2\text{Cl}_2$ /acetone mixture afforded pure *trans N*-nosyl-*O*-mesylate **31**, as a liquid:  $[\alpha]_{\text{D}}^{20} +182.5$  ( $c$  0.5,  $\text{CHCl}_3$ );  $R_f = 0.22$  (4:6 hexane/AcOEt); FTIR (neat film)  $\square$  3389, 1601, 1377, 1265, 1091, 1024  $\text{cm}^{-1}$ .  $^1\text{H}$  NMR ( $\text{CD}_3\text{CN}$ )  $\square$  8.02-8.17 (m, 3H), 7.76-7.95 (m, 9H), 7.22-7.43 (m, 5H), 6.56 (d, 1H,  $J = 6.2$  Hz), 6.17 (br, s, 2H, NH), 5.94-6.07 (m, 1H, NH), 5.75 (dt, 1H,  $J = 10.1, 2.5$  Hz), 5.68 (dt, 1H,  $J = 10.1, 2.5$  Hz), 5.60 (d, 1H,  $J = 10.2$  Hz), 5.48 (d, 1H,  $J = 10.2$  Hz), 4.99 (d, 1H,  $J = 2.5$  Hz), 4.97 (d, 1H,  $J = 2.5$  Hz), 4.88 (s, 1H), 4.63 (ddd, 1H,  $J = 6.2, 5.5, 1.7$  Hz), 4.38 (d, 1H,  $J = 12.0$  Hz), 4.33 (d, 1H,  $J = 12.0$  Hz), 4.22-4.32 (m, 2H), 4.10-4.21 (m, 1H), 3.87-4.07 (m, 5H), 3.63-3.86 (m, 3H), 3.51-3.61 (m, 2H), 3.13 (s, 3H).  $^{13}\text{C}$  NMR ( $\text{CD}_3\text{CN}$ )  $\square$  148.8, 148.7, 148.2, 139.6, 135.7, 135.5, 135.4, 134.6, 134.4, 134.2, 134.1, 134.0, 133.6, 131.9, 131.6, 131.2, 129.3, 128.5, 128.4, 128.3, 128.2, 126.4, 126.1, 118.3, 97.0, 95.3, 94.6, 75.9, 73.7, 71.1, 69.8, 69.5, 67.5, 66.7, 55.3, 50.0, 49.5, 48.5, 38.7, 30.9, 29.7. Anal. Calcd for  $\text{C}_{44}\text{H}_{46}\text{N}_6\text{O}_{21}\text{S}_4$ : C, 48.44; H, 4.25; N, 7.70. Found: C, 48.79; H, 4.65; N, 7.38.

**Isopropyl 6-*O*-[6'-*O*-[6''-*O*-(benzyl)-2'',3'',4''-trideoxy-4''-*N*-(nosylamino)- $\alpha$ -D-erythro-hex-2''-enopyranosyl]-2',3',4'-trideoxy-4'-*N*-(nosylamino)- $\alpha$ -D-erythro-hex-2'-enopyranosyl]-2,3,4-trideoxy-4-*N*-(nosylamino)- $\alpha$ -D-erythro-hex-2-enopyranoside (33)**

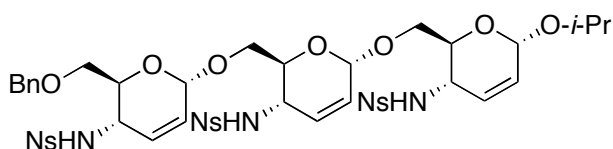

**33**

A solution of *trans* *N*-nosyl-*O*-mesylate **31** (0.10 g, 0.089 mmol) in *i*-PrOH (6.0 mL) was treated with K<sub>2</sub>CO<sub>3</sub> (0.037 g, 0.27 mmol, 3 equiv) and the reaction mixture was stirred 16 h at room temperature. After filtration, the organic solution was evaporated to give a crude product consisting of isopropyl  $\alpha$ -*O*-glycoside **33** (trisaccharide **33**) (0.087 g, 90% yield), pure as a liquid: [ $\alpha$ ]<sub>D</sub><sup>20</sup> +196.8 (*c* 0.7, CHCl<sub>3</sub>); R<sub>f</sub> = 0.28 (4:6 hexane/AcOEt); FTIR (neat film)  $\nu$  3379, 1587, 1464, 1381, 1267, 1194, 1161, 1078, 1041, 968 cm<sup>-1</sup>. <sup>1</sup>H NMR (CD<sub>3</sub>CN)  $\delta$  8.04-8.19 (m, 3H), 7.74-7.93 (m, 9H), 7.25-7.41 (m, 5H), 6.03-6.23 (m, 3H, NH), 5.62-5.81 (m, 3H), 5.60 (d, 1H, *J* = 10.2 Hz), 5.47 (d, 1H, *J* = 10.2 Hz), 5.39 (d, 1H, *J* = 10.2 Hz), 5.04 (d, 1H, *J* = 2.6 Hz), 5.01 (d, 1H, *J* = 2.6 Hz), 4.97 (d, 1H, *J* = 2.8 Hz), 4.41 (d, 1H, *J* = 12.0 Hz), 4.36 (d, 1H, *J* = 12.0 Hz), 3.54-4.22 (m, 13H), 1.19 (d, 3H, *J* = 6.2 Hz), 1.12 (d, 3H, *J* = 6.2 Hz). <sup>13</sup>C NMR (CD<sub>3</sub>CN)  $\delta$  148.6, 139.6, 135.5, 135.4, 135.3, 134.6, 134.5, 134.3, 134.1, 134.0, 131.6, 131.5, 130.7, 130.4, 129.4, 129.2, 128.7, 128.5, 128.4, 126.2, 126.1, 126.0, 95.0, 94.7, 93.0, 73.7, 71.0, 69.8, 69.6, 69.5, 69.0, 68.7, 67.6, 50.5, 49.9, 49.5, 24.0, 22.1. Anal. Calcd for C<sub>46</sub>H<sub>50</sub>N<sub>6</sub>O<sub>19</sub>S<sub>3</sub>: C, 50.82; H, 4.64; N, 7.73. Found: C, 51.03; H, 4.39; N, 7.89.

**Isopropyl 6-*O*-[6'-*O*-[6''-*O*-(benzyl)-2'',3'',4''-trideoxy-4''-amino- $\alpha$ -D-erythro-hex-2''-enopyranosyl]-2',3',4'-trideoxy-4'-amino- $\alpha$ -D-erythro-hex-2'-enopyranosyl]-2,3,4-trideoxy-4-amino- $\alpha$ -D-erythro-hex-2-enopyranoside (6)**

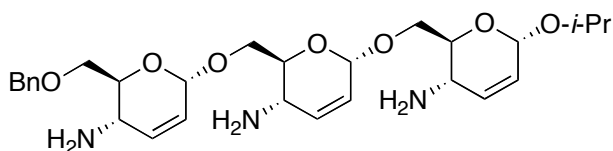

**6**

A solution of trisaccharide **33** (0.031 g, 0.029 mmol) in anhydrous MeCN (1.0 mL) was treated at room temperature with PhSH (27  $\mu$ L, 0.26 mmol, 3 equiv) in the presence of K<sub>2</sub>CO<sub>3</sub> (0.048 g, 0.35 mmol, 4 equiv) and the resulting reaction mixture was stirred 5 h at room temperature. Dilution with AcOEt and evaporation of the filtered (Celite) organic solution



afforded a crude product consisting of isopropyl  $\beta$ -*O*-glycoside **6** and excess of PhSH ( $^1\text{H}$  NMR), which was subjected to preparative TLC with a 9:1 chloroform/methanol mixture, as the eluant. Extraction by 1:1 acetone/methanol mixture of the lower moving, most intense band afforded pure isopropyl  $\beta$ -*O*-glycoside **6** (trisaccharide **6**) (0.010 g, 65% yield), pure as a liquid:  $[\alpha]_{\text{D}}^{20} +62.1$  (*c* 0.3,  $\text{CHCl}_3$ );  $R_f = 0.14$  (1:1  $\text{CHCl}_3/\text{MeOH}$ ); FTIR (neat film)  $\nu$  3375, 1660, 1454, 1383, 1317, 1099, 1016  $\text{cm}^{-1}$ .  $^1\text{H}$  NMR ( $\text{CDCl}_3$ )  $\delta$  7.25-7.40 (m, 5H), 5.74-5.86 (m, 3H), 5.56-5.73 (m, 3H), 5.02 (broad s, 1H), 4.98 (broad s, 1H), 4.94 (t, 1H,  $J = 1.0$  Hz), 4.58 (d, 1H,  $J = 11.9$  Hz), 4.54 (d, 1H,  $J = 11.9$  Hz), 3.85-4.08 (m, 3H), 3.40-3.82 (m, 7H), 3.07-3.35 (m, 3H), 1.16 (d, 3H,  $J = 6.2$  Hz), 1.10 (d, 3H,  $J = 6.2$  Hz).  $^{13}\text{C}$  NMR ( $\text{CD}_3\text{CN}$ )  $\delta$  139.8, 136.7, 136.6, 136.0, 129.3, 128.7, 128.4, 126.8, 125.8, 94.6, 94.5, 93.5, 74.1, 73.8, 73.7, 73.5, 71.6, 70.5, 68.1, 67.9, 47.6, 47.1, 47.0, 30.9, 24.1, 22.3. Anal. Calcd for  $\text{C}_{28}\text{H}_{41}\text{N}_3\text{O}_7$ : C, 63.26; H, 7.77; N, 7.90. Found: C, 63.01; H, 7.54; N, 7.67. MS, Calcd for  $[\text{C}_{28}\text{H}_{41}\text{N}_3\text{O}_7 + \text{H}^+] = 532.3$ . Found 532.3.

## Synthesis of disaccharides 34, 36 and 41

(Schemes 7 and 8, text)

*t*-Butyl 6-*O*-[6'-*O*-(benzyl)-2',3'-dideoxy- $\alpha$ -D-threo-hex-2'-enopyranosyl]-2,3-dideoxy- $\alpha$ -D-threo-hex-2-enopyranoside (34)

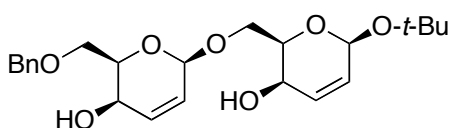

34

Following the procedure previously used for the preparation of trisaccharide **5**, a solution of *trans* hydroxy mesylate **16** (0.050 g, 0.113 mmol) in anhydrous *t*-BuOH (1.0 mL) was treated with *t*-BuOK (0.019 g, 0.17 mmol) and the resulting mixture was stirred 24 h at room temperature. Dilution with AcOEt and evaporation of the washed (saturated aqueous NaCl) organic solution afforded a crude product (0.045 g) consisting of *t*-butyl  $\alpha$ -*O*-glycoside **34** ( $^1\text{H}$  NMR), which was subjected to flash chromatography. Elution with a 3:7 hexane/AcOEt mixture afforded pure *t*-butyl  $\alpha$ -*O*-glycoside **34** (disaccharide **34**) (0.031 g, 65% yield), pure as a liquid:  $[\alpha]_D^{20}$  -101.2 (*c* 0.8,  $\text{CHCl}_3$ );  $R_f$  = 0.26 (3:7 hexane/AcOEt); FTIR (neat film)  $\nu$  3454, 1655, 1367, 1261, 1103, 1047  $\text{cm}^{-1}$ .  $^1\text{H}$  NMR ( $\text{CD}_3\text{CN}$ )  $\delta$  7.29-7.38 (m, 5H), 5.90-6.04 (m, 2H), 5.77 (dt, 1H,  $J$  = 10.1, 0.9 Hz), 5.67 (dt, 1H,  $J$  = 10.1, 0.9 Hz), 5.22 (dd, 1H,  $J$  = 2.8, 1.5 Hz), 5.11 (dd, 1H,  $J$  = 2.8, 1.5 Hz), 4.56 (d, 1H,  $J$  = 12.3 Hz), 4.55 (d, 1H,  $J$  = 12.3 Hz), 3.62-3.96 (m, 8H), 3.13 (d, 1H,  $J$  = 7.7 Hz, OH), 3.02 (d, 1H,  $J$  = 7.9 Hz, OH), 1.23 (s, 9H).  $^{13}\text{C}$  NMR ( $\text{CD}_3\text{CN}$ )  $\delta$  139.7, 133.4, 131.7, 131.1, 130.7, 129.3, 128.6, 128.7, 128.5, 99.2, 93.5, 76.1, 75.5, 75.3, 73.8, 70.8, 69.2, 62.9, 62.4, 29.1, 28.9. Anal. Calcd for  $\text{C}_{23}\text{H}_{32}\text{O}_7$ : C, 65.68; H, 7.66. Found: C, 65.89; H, 7.51. MS, Calcd for  $[\text{C}_{23}\text{H}_{32}\text{O}_7 + \text{Na}^+]$  = 443.2. Found 443.1. Calcd for  $[\text{C}_{23}\text{H}_{32}\text{O}_7 + \text{Cl}^-]$  = 455.2. Found 455.2.

Isopropyl 6-*O*-[6'-*O*-(benzyl)-2',3',4'-trideoxy-4'-*N*-(nosylamino)- $\alpha$ -D-erythro-hex-2'-enopyranosyl]-2,3,4-trideoxy-4-*N*-(nosylamino)- $\alpha$ -D-erythro-hex-2-enopyranoside (35)

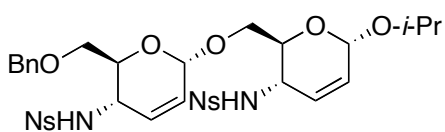

35

Following the same procedure used for the synthesis of trisaccharide **33**, a solution of *trans* *N*-nosyl *O*-mesylate **28** (0.050 g, 0.068 mmol) in anhydrous *i*-PrOH (4.0 mL) was treated with K<sub>2</sub>CO<sub>3</sub> (0.028 g, 0.205 mmol, 3 equiv) and the resulting mixture was stirred 48 h at room temperature. Dilution with AcOEt and evaporation of the washed (saturated aqueous NaCl) organic solution afforded a crude product (0.042 g) consisting of isopropyl  $\beta$ -*O*-glycoside **35** (disaccharide **35**) (<sup>1</sup>H NMR) which was subjected to preparative TLC with a 4:6 hexane/AcOEt mixture as the eluant. Extraction of the most intense band afforded pure disaccharide **35** (0.036 g, 73% yield), pure as a liquid: [ $\alpha$ ]<sub>D</sub><sup>20</sup> +150.8 (*c* 0.2, CHCl<sub>3</sub>); R<sub>f</sub> = 0.39 (4:6 hexane/AcOEt). FTIR (neat film)  $\nu$  3379, 1545, 1464, 1381, 1261, 1174, 1084, 1026, 968 cm<sup>-1</sup>. <sup>1</sup>H NMR (CD<sub>3</sub>CN)  $\delta$  8.04-8.13 (m, 2H), 7.67-7.88 (m, 6H), 7.25-7.40 (m, 5H), 6.10 (broad s, 2H, NH), 5.72 (ddd, 1H, *J* = 10.1, 2.7, 2.3 Hz), 5.65 (ddd, 1H, *J* = 10.1, 2.7, 2.3 Hz), 5.56-5.62 (m, 1H), 5.39 (dt, 1H, *J* = 10.0, 1.2 Hz), 5.01 (d, 1H, *J* = 2.7 Hz), 4.97 (d, 1H, *J* = 2.7 Hz), 4.37 (d, 1H, *J* = 12.0 Hz), 4.33 (d, 1H, *J* = 12.0 Hz), 4.09-4.18 (m, 1H), 3.83-4.08 (m, 4H), 3.78 (dd, 1H, *J* = 11.4, 4.6 Hz), 3.65 (dd, 1H, *J* = 11.4, 2.1 Hz), 3.49-3.58 (m, 2H), 1.16 (d, 3H, *J* = 6.2 Hz), 1.09 (d, 3H, *J* = 6.2 Hz). <sup>13</sup>C NMR (CD<sub>3</sub>CN)  $\delta$  148.6, 139.5, 135.4, 135.3, 134.6, 134.3, 134.1, 134.0, 131.6, 131.5, 131.4, 130.1, 129.5, 129.2, 128.5, 128.4, 128.3, 126.1, 126.0, 94.7, 93.1, 73.7, 71.0, 69.7, 69.6, 69.2, 67.6, 50.0, 49.4, 24.0, 22.2. Anal. Calcd for C<sub>34</sub>H<sub>38</sub>N<sub>4</sub>O<sub>13</sub>S<sub>2</sub>: C, 52.70; H, 4.95; N, 7.23. Found: C, 52.54; H, 4.72; N, 7.01.

**Isopropyl 6-*O*-[6'-*O*-(benzyl)-2',3',4'-trideoxy-4'-amino- $\beta$ -D-erythro-hex-2'-enopyranosyl]-2,3,4-trideoxy-4-amino- $\beta$ -D-erythro-hex-2-enopyranoside (**36**)**

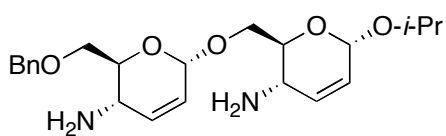

**36**

Following the same procedure previously used for the preparation of trisaccharide **6**, the treatment of a solution of disaccharide **35** (0.025 g, 0.032 mmol) in anhydrous MeCN (1.0 mL) with K<sub>2</sub>CO<sub>3</sub> (0.034 g, 0.25 mmol, 4 equiv) in the presence of PhSH (20  $\mu$ L, 0.19 mmol, 3 equiv) afforded, after 4 h stirring at room temperature, a crude product (0.029 g) consisting of isopropyl  $\beta$ -*O*-glycoside **36** (disaccharide **36**) (<sup>1</sup>H NMR) and excess of PhSH which was subjected to preparative TLC with a 95:5 CHCl<sub>3</sub>/MeOH mixture as the eluant. Extraction of the most intense band afforded pure disaccharide **36** (0.009 g, 69% yield), pure as a liquid: [ $\alpha$ ]<sub>D</sub><sup>20</sup> +19.3 (*c* 0.6, CHCl<sub>3</sub>); R<sub>f</sub> = 0.11 (95:5 CHCl<sub>3</sub>/MeOH); FTIR (neat film)  $\nu$  3373, 1660,

1261, 1095, 1022  $\text{cm}^{-1}$ .  $^1\text{H}$  NMR (acetone- $d_6$ )  $\square$  7.25-7.38 (m, 5H), 5.76 (dt, 1H,  $J = 10.0$ , 2.6 Hz), 5.69 (dt, 1H,  $J = 10.0$ , 2.6 Hz), 5.44-5.55 (m, 2H), 5.08 (broad s, 1H), 5.02-5.05 (m, 1H), 4.58 (d, 1H,  $J = 12.1$  Hz), 4.50 (d, 1H,  $J = 12.1$  Hz), 4.09-4.18 (m, 1H), 3.91-4.08 (m, 4H), 3.79 (dd, 1H,  $J = 11.0$ , 5.0 Hz), 3.54-3.60 (m, 1H), 3.45-3.53 (m, 2H), 1.20 (d, 3H,  $J = 6.2$  Hz), 1.11 (d, 3H,  $J = 6.2$  Hz).  $^{13}\text{C}$  NMR (acetone- $d_6$ )  $\square$  140.4, 137.7, 129.4, 128.6, 128.4, 128.2, 127.4, 96.9, 95.3, 74.0, 71.2, 70.5, 56.2, 56.1, 24.6, 22.7. Anal. Calcd for  $\text{C}_{22}\text{H}_{32}\text{N}_2\text{O}_5$ : C, 65.31; H, 7.98; N, 6.93. Found: C, 65.49; H, 7.61; N, 6.74. MS, Calcd for  $[\text{C}_{22}\text{H}_{32}\text{N}_2\text{O}_5 + \text{H}^+] = 405.2$ . Found 405.2.

**6-*O*-[6'-*O*-(benzyl)-2',3',4'-trideoxy-4'-*N*-(nosylamino)- $\square$ -D-erythro-hex-2'-enopyranosyl]-4-*O*-mesyl-3-*O*-(*t*-butyldimethylsilyl)-D-glucal (37)**

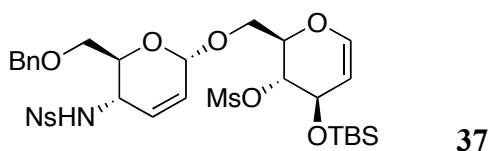

Following the same procedure used for the synthesis of  $\square$ -*O*-glycoside **27**, a solution of *trans* *N*-nosyl-*O*-mesylate **26** (0.100 g, 0.24 mmol) in anhydrous MeCN (12 mL) was treated with  $\text{K}_2\text{CO}_3$  (0.099 g, 0.72 mmol, 3 equiv) in the presence of alcohol **7** (0.162 g, 0.48 mmol, 2 equiv) and the reaction mixture was stirred at room temperature for 16 h. Dilution with  $\text{Et}_2\text{O}$  and evaporation of the washed (saturated aqueous NaCl) organic solution afforded a crude product (0.222 g) consisting of  $\square$ -*O*-glycoside **37** and unreacted alcohol **7** ( $^1\text{H}$  NMR), which was subjected to flash chromatography. Elution with a 9:1  $\text{CH}_2\text{Cl}_2/i\text{-Pr}_2\text{O}$  mixture yielded  $\square$ -*O*-glycoside **37** (0.122 g, 68% yield), pure as a solid, mp 48-49°C:  $[\alpha]^{20}_{\text{D}} +34.8$  ( $c$  0.3,  $\text{CHCl}_3$ );  $R_f = 0.54$  (1:1 hexane/AcOEt); FTIR (nujol)  $\square$  3350, 1649, 1543, 1458, 1359, 1255, 1176, 1072, 962  $\text{cm}^{-1}$ .  $^1\text{H}$  NMR ( $\text{CDCl}_3$ )  $\square$  8.06-8.12 (m, 1H), 7.79-7.86 (m, 1H), 7.58-7.74 (m, 2H), 7.33 (s, 5H), 6.30 (d, 1H,  $J = 6.0$  Hz), 5.75 (dt, 1H,  $J = 10.0$ , 2.5 Hz), 5.55 (d, 1H,  $J = 10.0$  Hz), 5.45 (d, 1H,  $J = 9.2$  Hz), 5.02 (broad s, 1H), 4.70-4.79 (m, 2H), 4.48 (s, 2H), 4.26-4.38 (m, 3H), 4.01-4.08 (m, 1H), 3.94 (dt, 1H,  $J = 9.8$ , 2.7 Hz), 3.80 (dd, 1H,  $J = 11.0$ , 4.5 Hz), 3.68 (d, 2H,  $J = 2.7$  Hz), 3.06 (s, 3H), 0.87 (s, 9H), 0.10 (s, 6H).  $^{13}\text{C}$  NMR ( $\text{CDCl}_3$ )  $\square$  147.8, 143.5, 138.2, 134.4, 133.9, 133.1, 131.0, 130.3, 128.4, 127.8, 127.7, 125.5, 101.7, 94.2, 75.5, 74.8, 73.6, 69.4, 68.6, 68.1, 64.9, 48.6, 39.0, 25.8, 18.1, -4.4. Anal. Calcd for  $\text{C}_{32}\text{H}_{44}\text{N}_2\text{O}_{12}\text{S}_2\text{Si}$ : C, 51.88; H, 5.99; N, 3.78. Found: C, 51.53; H, 5.69; N, 3.62.

**6-*O*-[6'-*O*-(benzyl)-2',3',4'-trideoxy-4'-*N*-(nosylamino)- $\alpha$ -D-erythro-hex-2'-enopyranosyl]-4-*O*-mesyl-D-glucal (**38**)**

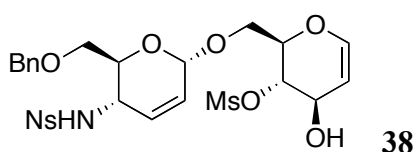

Following the same procedure used for the preparation of *trans* hydroxy mesylate **16**, the treatment of a solution of  $\alpha$ -*O*-glycoside **37** (0.074 g, 0.10 mmol) in anhydrous THF (4.4 mL) with 1M TBAF in THF (0.1 mL) afforded, after 1 h at 0°C, a crude liquid product (0.061 g, 97% yield) consisting of *trans* hydroxy mesylate **38**, which was sufficiently pure to be used in the next step without any further purification:  $R_f = 0.07$  (3:7 hexane/AcOEt); FTIR (neat film)  $\nu$  3302, 1543, 1462, 1365, 1176, 1062, 972  $\text{cm}^{-1}$ .  $^1\text{H NMR}$  ( $\text{CDCl}_3$ )  $\delta$  7.98-8.05 (m, 1H), 7.48-7.75 (m, 3H), 7.35 (s, 5H), 6.17 (d, 1H,  $J = 6.0$  Hz), 5.72 (d, 1H,  $J = 10.1$  Hz), 5.50 (d, 1H,  $J = 10.4$  Hz), 4.95 (broad s, 1H), 4.83 (dd, 1H,  $J = 6.0, 1.8$  Hz), 4.68-4.77 (m, 1H), 4.44-4.52 (m, 1H), 4.21-4.43 (m, 3H), 3.90-4.06 (m, 3H), 3.50-3.75 (m, 3H), 3.19 (s, 3H).

***t*-Butyl 6-*O*-[6'-*O*-(benzyl)-2',3',4'-trideoxy-4'-*N*-(nosylamino)- $\alpha$ -D-erythro-hex-2'-enopyranosyl]-2,3-dideoxy- $\alpha$ -D-threo-hex-2-enopyranoside (**40**)**

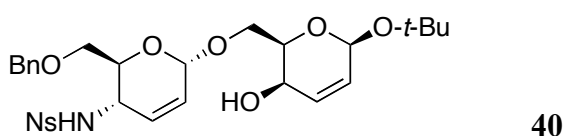

Following the same procedure used for the preparation of trisaccharide **5**, the treatment of a solution of *trans* hydroxy mesylate **38** (0.061 g, 0.097 mmol) in *t*-BuOH (1.2 mL) with *t*-BuOK (0.013 g, 0.112 mmol) afforded, after 48 h stirring at room temperature, a crude product (0.060 g) consisting of *t*-butyl  $\alpha$ -*O*-glycoside **40** (disaccharide **40**) ( $^1\text{H NMR}$ ) which was subjected to flash chromatography. Elution with a 3:7 hexane/AcOEt mixture yielded disaccharide **40** (0.042 g, 72% yield), pure as a liquid:  $[\alpha]_D^{20} +69.8$  ( $c$  0.4,  $\text{CHCl}_3$ );  $R_f = 0.29$  (3:7 hexane/AcOEt); FTIR (neat film)  $\nu$  3377, 1462, 1381, 1263, 1085, 1020, 972  $\text{cm}^{-1}$ .  $^1\text{H NMR}$  ( $\text{CDCl}_3$ )  $\delta$  8.07-8.14 (m, 1H), 7.80-7.87 (m, 1H), 7.60-7.76 (m, 2H), 7.33 (s, 5H), 6.08 (ddd, 1H,  $J = 10.0, 5.1, 1.4$  Hz), 5.67-5.79 (m, 2H), 5.51 (d, 1H,  $J = 10.0$  Hz), 5.34 (d, 1H,  $J = 9.1$  Hz), 5.20 (d, 1H,  $J = 0.8$  Hz), 5.04 (d, 1H,  $J = 2.2$  Hz), 4.50 (s, 2H), 4.24-4.36 (m, 1H), 3.65-3.95 (m, 6H), 1.27 (s, 9H).  $^{13}\text{C NMR}$  ( $\text{CDCl}_3$ )  $\delta$  147.9, 138.2, 134.4, 134.0, 133.2, 133.1, 131.0, 130.2, 129.9, 128.5, 127.8, 127.7, 125.5, 94.4, 93.0, 76.2, 74.2, 73.7, 69.5, 68.8,

68.1, 62.3, 48.8, 28.8. Anal. Calcd for C<sub>29</sub>H<sub>36</sub>N<sub>2</sub>O<sub>10</sub>S: C, 57.60; H, 6.00; N, 4.64. Found: C, 57.42; H, 5.75; N, 4.39.

***t*-Butyl 6-*O*-[6'-*O*-(benzyl)-2',3',4'-trideoxy-4'-amino- $\alpha$ -D-erythro-hex-2'-enopyranosyl]-2,3-dideoxy- $\alpha$ -D-threo-hex-2-enopyranoside (41)**

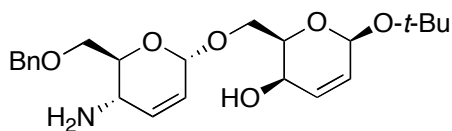

**41**

Following the same procedure previously used for the preparation of trisaccharide **6**, the treatment of a solution of disaccharide **40** (0.034 g, 0.056 mmol) in anhydrous MeCN (1.5 mL) with K<sub>2</sub>CO<sub>3</sub> (0.031 g, 0.225 mmol, 4 equiv) in the presence of PhSH (17  $\mu$ L, 0.169 mmol, 3 equiv) afforded, after 24 h stirring at room temperature, a crude product consisting of *i*-propyl  $\alpha$ -*O*-glycoside **41** (disaccharide **41**) (<sup>1</sup>H NMR) and excess of PhSH which was subjected to preparative TLC with a 96:4 CHCl<sub>3</sub>/MeOH mixture, as the eluant. Extraction of the most intense lower moving band afforded pure disaccharide **41** (0.015 g, 64% yield), pure as a solid. mp 83-85°C: [ $\alpha$ ]<sub>D</sub><sup>20</sup> -12.4 (*c* 0.3, CHCl<sub>3</sub>); R<sub>f</sub> = 0.29 (96:4 CHCl<sub>3</sub>/MeOH); FTIR (nujol)  $\bar{\nu}$  3234, 1581, 1464, 1371, 1257, 1118, 1099, 1047, 968 cm<sup>-1</sup>. <sup>1</sup>H NMR (CDCl<sub>3</sub>)  $\delta$  7.27-7.38 (m, 5H), 6.09 (dd, 1H, *J* = 10.0, 4.9 Hz), 5.86 (d, 1H, *J* = 10.0 Hz), 5.67-5.78 (m, 2H), 5.21 (broad s, 1H), 5.06 (broad s, 1H), 4.66 (d, 1H, *J* = 12.1 Hz), 4.54 (d, 1H, *J* = 12.1 Hz), 3.76-3.96 (m, 4H), 3.70-3.75 (m, 2H), 3.60-3.69 (m, 1H), 3.38-3.48 (m, 1H), 1.27 (s, 9H). C NMR (CDCl<sub>3</sub>)  $\delta$  138.3, 135.1, 132.9, 130.3, 128.6, 127.8, 125.7, 94.8, 93.0, 76.1, 74.2, 73.6, 72.7, 70.3, 67.9, 62.3, 47.0, 28.9. Anal. Calcd for C<sub>23</sub>H<sub>33</sub>NO<sub>6</sub>: C, 65.85; H, 7.93; N, 3.34. Found: C, 65.49; H, 7.61; N, 3.02.

## References

- 1) Papa, A. J. *J. Org. Chem.* **1966**, *31*, 1426.
- 2) Di Bussolo, V.; Favero, L.; Macchia, F.; Pineschi, M.; Crotti, P. *Tetrahedron* **2002**, *58*, 6069.
- 3) (a) Di Bussolo, V.; Caselli, M.; Pineschi, M.; Crotti, P. *Org. Lett.* **2003**, *5*, 2173. (b) Di Bussolo, V.; Caselli, M.; Romano, M. R.; Pineschi, M.; Crotti, P. *J. Org. Chem.* **2004**, *69*, 8702.
- 4) Di Bussolo, V.; Romano, M. R.; Pineschi, M.; Crotti, P. *Tetrahedron* **2007**, *63*, 2482.
